# Supplementary material
Source: PubMed Central journal article supplement (PMC2858018)
Supplement: supp_123_9_1407__4.pdf [file supp_123_9_1407__4.pdf]

**Table S1. Source and version of the genomes used in the analysis.**

| Species                               | Source                      | Version            | Web reference                     |
|---------------------------------------|-----------------------------|--------------------|-----------------------------------|
| <i>Apis mellifera</i>                 | beebase                     | v2<br>(prerelease) | racex00.tamu.edu                  |
| <i>Arabidopsis thaliana</i>           | TAIR                        | TAIR7              | www.arabidopsis.org/              |
| <i>Aspergillus nidulans</i>           | Broad Institute             | v1.0               | www.broad.mit.edu/annotation/fgi/ |
| <i>Aureococcus anophagefferens</i>    | JGI                         | v1.0               | www.jgi.doe.gov/                  |
| <i>Batrachochytrium dendrobatidis</i> | Broad Institute             | v1.0               | www.broad.mit.edu/annotation/fgi/ |
| <i>Caenorhabditis elegans</i>         | WormBase                    | WS170              | www.wormbase.org/                 |
| <i>Capitella sp.</i>                  | JGI                         | v1.0               | www.jgi.doe.gov/                  |
| <i>Chlamydomonas reinhardtii</i>      | JGI                         | v3.1               | www.jgi.doe.gov/                  |
| <i>Ciona intestinalis</i>             | JGI                         | v2.0               | www.jgi.doe.gov/                  |
| <i>Cryptosporidium parvum</i>         | CryptoDB                    | v3.4               | www.cryptodb.org/                 |
| <i>Cyanidioschyzon merolae</i>        | C.merolae<br>genome project | v1                 | merolae.biol.s.u-tokyo.ac.jp/     |
| <i>Danio rerio</i>                    | VEGA                        | May 2007           | vega.sanger.ac.uk/                |
| <i>Dictyostelium discoideum</i>       | dictyBase                   | 05-20-2007         | dictybase.org/                    |
| <i>Drosophila melanogaster</i>        | ENSEMBL                     | BDGP4.3,<br>44.43b | www.ebi.ac.uk/ensembl/            |
| <i>Encephalitozoon cuniculi</i>       | NCBI                        | 1                  | www.ncbi.nlm.nih.gov              |
| <i>Entamoeba histolytica</i>          | geneDB                      | 17102005           | www.genedb.org/                   |
| <i>Gallus gallus</i>                  | ENSEMBL                     | WASHUC2,<br>44.2b  | www.ebi.ac.uk/ensembl/            |
| <i>Giardia lamblia</i>                | GiardiaDB                   | v1.0               | www.giardiadb.org/                |
| <i>Homo sapiens</i>                   | VEGA                        | Jun-07             | vega.sanger.ac.uk/                |
| <i>Leishmania major</i>               | geneDB                      | v5.2               | www.genedb.org/                   |
| <i>Lottia gigantea</i>                | JGI                         | v1.0               | www.jgi.doe.gov/                  |
| <i>Monosiga brevicollis</i>           | JGI                         | v1.0               | www.jgi.doe.gov/                  |
| <i>Naegleria gruberi</i>              | JGI                         | v1.0               | www.jgi.doe.gov/                  |
| <i>Nematostella vectensis</i>         | JGI                         | v1.0               | www.jgi.doe.gov/                  |
| <i>Neurospora crassa</i>              | Broad Institute             | v7.0               | www.broad.mit.edu/annotation/fgi/ |
| <i>Oryza sativa</i>                   | TIGR                        | v5.0               | www.tigr.org/tdb/e2k1/osa1/       |
| <i>Ostreococcus tauri</i>             | JGI                         | v2.0               | www.jgi.doe.gov/                  |

|                                      |                               |                  |                                   |
|--------------------------------------|-------------------------------|------------------|-----------------------------------|
| <i>Paramecium tetraurelia</i>        | ParameciumDB                  | v1.04            | paramecium.cgm.cnrs-gif.fr/       |
| <i>Phaeodactylum tricornutum</i>     | JGI                           | v2.0             | www.jgi.doe.gov/                  |
| <i>Physcomitrella patens</i>         | JGI                           | v1.1             | www.jgi.doe.gov/                  |
| <i>Phytophthora sojae</i>            | JGI                           | v1.1             | www.jgi.doe.gov/                  |
| <i>Plasmodium falciparum</i>         | PlasmoDB                      | v5.2             | www.plasmodb.org/                 |
| <i>Populus trichocarpa</i>           | JGI                           | v1.1             | www.jgi.doe.gov/                  |
| <i>Rhizopus oryzae</i>               | Broad Institute               | v3.0             | www.broad.mit.edu/annotation/fgi/ |
| <i>Saccharomyces cerevisiae</i>      | Saccharomyces genome database | 20070713         | www.yeastgenome.org/              |
| <i>Schistosoma mansoni</i>           | geneDB                        | v4.0             | www.genedb.org/                   |
| <i>Schizosaccharomyces pombe</i>     | Sanger                        | v19              | www.sanger.ac.uk/Projects/S_pombe |
| <i>Strongylocentrotus purpuratus</i> | Baylor College of Medicine    | Spur_2.1, v4     | www.hgsc.bcm.tmc.edu/             |
| <i>Takifugu rubripes</i>             | ENSEMBL                       | Assembly4, 44.4e | www.ebi.ac.uk/ensembl/            |
| <i>Tetrahymena thermophila</i>       | TIGR                          | 10/24/2006       | www.tigr.org/tdb/e2k1/tta1/       |
| <i>Thalassiosira pseudonana</i>      | JGI                           | v3.0             | www.jgi.doe.gov/                  |
| <i>Theileria annulata</i>            | GeneDB                        | v4               | www.genedb.org/                   |
| <i>Toxoplasma gondii</i>             | ToxoDB                        | v4.1             | www.toxodb.org/                   |
| <i>Trichomonas vaginalis</i>         | TIGR                          | 20050331         | www.tigr.org/tdb/e2k1/tvg/        |
| <i>Trichoplax adhaerens</i>          | JGI                           | v1.0             | www.jgi.doe.gov/                  |
| <i>Trypanosoma brucei</i>            | geneDB                        | v4               | www.genedb.org/                   |
| <i>Ustilago maydis</i>               | Broad Institute               | v1.0             | www.broad.mit.edu/annotation/fgi/ |
