# Supplementary material
Source: PubMed Central journal article supplement (PMC2858018)
Supplement: supp_123_9_1407__5.pdf [file supp_123_9_1407__5.pdf]

**Table S2. Information about proteins used in this analysis.**

| Protein   | Localisation                        | Additional information                                                                                                                                                                                                                                  | References                                                                                   |
|-----------|-------------------------------------|---------------------------------------------------------------------------------------------------------------------------------------------------------------------------------------------------------------------------------------------------------|----------------------------------------------------------------------------------------------|
| ALMS1     | Centrosome, basal body              | Mutated in Alström Syndrome                                                                                                                                                                                                                             | (Hearn et al., 2005)                                                                         |
| Asterless | Centrosome                          | Human centrosome proteome; required for centriole duplication in <i>Drosophila</i>                                                                                                                                                                      | (Andersen et al., 2003; Varmark et al., 2007; Blachon et al., 2008; Dobbelaere et al., 2008) |
| BBS1      |                                     | Mutated in Bardet-Biedl Syndrome; component of the biochemical complex BBSome which is important for ciliogenesis; mouse model with <i>BBS1</i> <sup>M309R/M309R</sup> (most common mutation in humans) has elongated cilia with swollen distal ends    | (Davis et al., 2007; Nachury et al., 2007)                                                   |
| BBS2      | Base of cilia                       | Mutated in Bardet-Biedl Syndrome; component of the biochemical complex BBSome which is important for ciliogenesis; not required for global ciliogenesis but <i>BBS2</i> <sup>-/-</sup> mice have cilia with swollen distal ends                         | (Nachury et al., 2007; Shah et al., 2008)                                                    |
| BBS3      |                                     | Mutated in Bardet-Biedl Syndrome; ARF-like GTPase; in <i>C. elegans</i> : expressed in ciliated neurons; undergoes IFT                                                                                                                                  | (Fan et al., 2004)                                                                           |
| BBS4      | Base of cilia                       | Mutated in Bardet-Biedl Syndrome; component of the biochemical complex BBSome which is important for ciliogenesis; <i>BBS4</i> <sup>-/-</sup> mouse model shows BBS4 is not required for global but spermatozoa ciliogenesis; BBS-4 interacts with PCM1 | (Mykytyn et al., 2004; Nachury et al., 2007)                                                 |
| BBS5      |                                     | Mutated in Bardet-Biedl Syndrome; component of the biochemical complex BBSome which is important for ciliogenesis; BBS5 has 2 PH domains which interact with Phosphatidylinositol 3-phosphate                                                           | (Nachury et al., 2007)                                                                       |
| BBS6      | Base of cilia (ring-shape), midbody | Mutated in Bardet-Biedl Syndrome; Type II Chaperonin-like protein                                                                                                                                                                                       | (Kim et al., 2005; Stoetzel et al., 2007)                                                    |
| BBS7      | Base of cilia and cilium            | Mutated in Bardet-Biedl Syndrome; component of the biochemical complex BBSome which is important for ciliogenesis; In <i>C. elegans</i> : BBS7 and BBS8 undergo IFT and are involved in stabilising IFT particle                                        | (Blacque et al., 2004; Ou et al., 2005; Nachury et al., 2007)                                |
| BBS8      | Base of cilia and cilium            | Mutated in Bardet-Biedl Syndrome; component of the biochemical complex BBSome which is important for ciliogenesis; In <i>C. elegans</i> : BBS7 and BBS8 undergo IFT and are involved in stabilising IFT particle                                        | (Blacque et al., 2004; Ou et al., 2005; Nachury et al., 2007)                                |

|             |                                                 |                                                                                                                                                                                                                                                        |                                                                                                         |
|-------------|-------------------------------------------------|--------------------------------------------------------------------------------------------------------------------------------------------------------------------------------------------------------------------------------------------------------|---------------------------------------------------------------------------------------------------------|
| BBS9        |                                                 | Mutated in Bardet-Biedl Syndrome; component of the biochemical complex BBSome which is important for ciliogenesis; BBS9 interacts with BBS8, 5, 4, 2 and 1                                                                                             | (Nachury et al., 2007)                                                                                  |
| BBS10       | Base of cilia                                   | Mutated in Bardet-Biedl Syndrome; involved in transient ciliogenesis in adipocytes; Type II Chaperonin-like protein                                                                                                                                    | (Stoetzel et al., 2007; Marion et al., 2009)                                                            |
| BBS11       |                                                 | Mutated in Bardet-Biedl Syndrome; E3 ubiquitin ligase                                                                                                                                                                                                  | (Chiang et al., 2006)                                                                                   |
| BBS12       | Base of cilia                                   | Mutated in Bardet-Biedl Syndrome; involved in transient ciliogenesis in adipocytes; Type II Chaperonin-like protein                                                                                                                                    | (Stoetzel et al., 2007; Marion et al., 2009)                                                            |
| BBS13 /MKS1 | Base of cilia                                   | Mutated in Bardet-Biedl Syndrome and Meckel-Gruber Syndrome; depletion results in block of centriole migration to apical membrane; interacts with MKS3                                                                                                 | (Dawe et al., 2007)                                                                                     |
| BBS14 /MKS4 | Centrosome, base of cilia/centriolar satellites | Mutated in Bardet-Biedl Syndrome, Meckel-Gruber Syndrome, Joubert Syndrome, and Nephronophthisis/Senoir-Loken Syndrome; positive regulator of ciliogenesis; CEP290 depletion prevents ciliogenesis; interacts with RPGR                                | (Chang et al., 2006; Sayer et al., 2006; McEwen et al., 2007; Kim, J. et al., 2008; Tsang et al., 2008) |
| CAP350      | Centrosome                                      | Human centrosome proteome; MT anchoring centrosome with FOP and EB1 and Ninein, p150glued; FOP seems required for CAP350 localisation to the mitotic spindle                                                                                           | (Andersen et al., 2003; Yan et al., 2006)                                                               |
| Centrin     | Centriole (distal end)                          | Required for centriole duplication in humans, Chlamydomonas, Tetrahymena; often multiple paralogues per species involved into many cellular processes                                                                                                  | (Salisbury et al., 2002; Koblenz et al., 2003; Stemm-Wolf et al., 2005)                                 |
| Centriolin  | Centriole (subdistal appendages), midbody       | Depletion and overexpression cause cytokinesis failure; anchoring of Exocyst and SNARE complexes at the midbody, required for secretory-vesicle-mediated abscission                                                                                    | (Gromley et al., 2003; Gromley et al., 2005)                                                            |
| CEP55       | Centrosome, midbody                             | Human centrosome proteome; recruitment of ESCRT-III/ALIX to the midbody                                                                                                                                                                                | (Andersen et al., 2003; Morita et al., 2007; Carlton et al., 2008)                                      |
| CEP68       | Centrosome                                      | Human centrosome proteome; centrosome cohesion                                                                                                                                                                                                         | (Andersen et al., 2003; Graser et al., 2007a)                                                           |
| CEP76       | Centriole (mature and pro-centriole)            | Human centrosome proteome; in <i>T. brucei</i> flagella proteome; interacts with CP110; depletion of CEP76 results in accumulation of centriolar intermediates (in some human cell lines); overexpression does not affect normal centriole duplication | (Andersen et al., 2003; Broadhead et al., 2006; Tsang et al., 2009)                                     |

|                |                                                   |                                                                                                                                                                                                                                                                                                                                                                                                                                                                                                                                                                                                    |                                                                                                                                                                   |
|----------------|---------------------------------------------------|----------------------------------------------------------------------------------------------------------------------------------------------------------------------------------------------------------------------------------------------------------------------------------------------------------------------------------------------------------------------------------------------------------------------------------------------------------------------------------------------------------------------------------------------------------------------------------------------------|-------------------------------------------------------------------------------------------------------------------------------------------------------------------|
| CEP97          | Centrosome                                        | Human centrosome proteome; CP110 and CEP97 suppress cilia assembly; CEP97 recruits CP110 to the centrosome, and vice versa                                                                                                                                                                                                                                                                                                                                                                                                                                                                         | (Andersen et al., 2003; Spektor et al., 2007)                                                                                                                     |
| CEP135 (BLD10) | Centriole (cartwheel)                             | Human centrosome proteome; <i>Chlamydomonas CEP135/BLD10</i> null mutant has no basal bodies but is viable; expression of truncated CEP135/BLD10 results in shorter cartwheel spokes (reduced centriole diameter with less MT triplets); depletion of CEP135/BLD10 in <i>Drosophila</i> induces shorter basal bodies leading to immotile sperm but not disturbed sensory function; CEP135/BLD10 interacts with C-NAP1 which is involved in linking the disengaged centrioles until centrosome splitting                                                                                            | (Andersen et al., 2003; Matsuura et al., 2004; Hiraki et al., 2007; Kim, K. et al., 2008; Mottier-Pavie and Megraw, 2009)                                         |
| CEP164         | Centriole (mature, distal appendages, ring-shape) | Human centrosome proteome; essential for primary cilia formation; not essential for centriole duplication in human cells                                                                                                                                                                                                                                                                                                                                                                                                                                                                           | (Otto et al., 2002; Graser et al., 2007b)                                                                                                                         |
| CEP192/SPD-2   | Centrosome                                        | Human centrosome proteome; recruitment of PCM to the centriole; in <i>C. elegans</i> embryos: essential for centriole duplication; in <i>Drosophila</i> : not required for somatic centriole duplication, indispensable for centriole duplication in the egg after fertilisation; centrosomal accumulation partially dependent on Aurora-A and Dynein, and co-dependent on SPD-5; SPD-2 required for ZYG-1 recruitment to the centrosome; overexpression results in multiple extra-centrosomal foci of gamma-tubulin and pericentrin which supports an early role of CEP192 in centrosome assembly | (Otto et al., 2002; Delattre et al., 2006; Pelletier et al., 2006; Dix and Raff, 2007; Gomez-Ferreria et al., 2007; Kleylein-Sohn et al., 2007; Zhu et al., 2008) |
| CP110          | Centriole (distal end), not at basal body         | negative regulator of cilia formation (together with CEP97); in human cells: essential for centrosome duplication; substrate for Cdk2; abundance is cell-cycle regulated (has protein degradation motif); depletion results in centriole elongation (no homogenous extension of the centriole, but elongated centrioles have frayed ends)                                                                                                                                                                                                                                                          | (Chen et al., 2002; Spektor et al., 2007; Tsang et al., 2008; Schmidt et al., 2009)                                                                               |
| DIP13          | Centriole, basal body, axoneme                    | In <i>Chlamydomonas</i> : depletion results in growth reduction, multi-nucleated, multi-flagellated cells                                                                                                                                                                                                                                                                                                                                                                                                                                                                                          | (Pfannenschmid et al., 2003)                                                                                                                                      |
| EB1            | MT, centrosome/spindle                            | Associated with MT plus ends (growing ends); tubulin sheet closure (zipper)                                                                                                                                                                                                                                                                                                                                                                                                                                                                                                                        | (Sandblad et al., 2006; Vitre et al., 2008)                                                                                                                       |
| FOP            | Centrosome                                        | Human centrosome proteome; MT anchoring at centrosome with CAP350 and EB1; FOP interacts with CAP350 and this interaction is required for FOP's centrosomal localisation; interacts with EB1, localisation to plus-end due to this interaction                                                                                                                                                                                                                                                                                                                                                     | (Andersen et al., 2003; Yan et al., 2006)                                                                                                                         |
| MKS3           | Primary cilium and plasma membrane                | Mutated in Meckel-Gruber Syndrome; interacts with MKS1; Depletion results in block of centriole migration to apical membrane                                                                                                                                                                                                                                                                                                                                                                                                                                                                       | (Dawe et al., 2007)                                                                                                                                               |
| MKS5           | Centrosome, basal body, cilium                    | Mutated in Meckel-Gruber Syndrome and Joubert Syndrome; interact with NPHP4                                                                                                                                                                                                                                                                                                                                                                                                                                                                                                                        | (Arts et al., 2007; Delous et al., 2007)                                                                                                                          |

|        |                                                                                            |                                                                                                                                                                                                                                                                |                                                                                       |
|--------|--------------------------------------------------------------------------------------------|----------------------------------------------------------------------------------------------------------------------------------------------------------------------------------------------------------------------------------------------------------------|---------------------------------------------------------------------------------------|
| MKS6   | Centrosome, base of cilium                                                                 | Mutated in Meckel-Gruber Syndrome and Joubert Syndrome; interacts with CEP290                                                                                                                                                                                  | (Gorden et al., 2008)                                                                 |
| C-NAP1 | Centrosome                                                                                 | Human centrosome proteome; involved in centriole coupling/linkage after disengagement                                                                                                                                                                          | (Mayor et al., 2002; Andersen et al., 2003; Kim, K. et al., 2008)                     |
| Ninein | Centrosome, around mother centriole appendages                                             | Centrosomal MT anchoring; non-nucleating MT minus-end stabilising; role in organising centrosomal proteins; interacts with $\gamma$ -tubulin                                                                                                                   | (Mogensen et al., 2000; Ou et al., 2002; Delgehr et al., 2005)                        |
| NPHP1  | Base of cilia                                                                              | Mutated in Nephronophthisis/Senoir-Loken Syndrome; interacts with signalling molecules involved in cell-adhesion and actin cytoskeleton organisation                                                                                                           | (Otto et al., 2002; Fliegauf et al., 2006)                                            |
| NPHP3  |                                                                                            | Mutated in Nephronophthisis/Senoir-Loken Syndrome                                                                                                                                                                                                              | (Olbrich et al., 2003)                                                                |
| NPHP4  | Primary cilium, base of cilium                                                             | Mutated in Nephronophthisis/Senoir-Loken Syndrome                                                                                                                                                                                                              | (Otto et al., 2002)                                                                   |
| NPHP5  | Primary cilium connecting cilia of photoreceptors, primary cilia of renal epithelial cells | Mutated in Nephronophthisis/Senoir-Loken Syndrome; interacts with RPGR                                                                                                                                                                                         | (Otto et al., 2005)                                                                   |
| PCM1   | Pericentriolar satellites, site of ciliogenesis                                            | Depletion results in reduced levels of centrin, pericentrin and ninein at centrosome, and disrupted centrosomal MT organisation; involved in MT- and dynactin-dependent recruitment of proteins to the centrosome; interacts with BBS4                         | (Kubo et al., 1999; Dammermann and Merdes, 2002; Nachury et al., 2007)                |
| PLK    |                                                                                            | Polo-like kinases; cell-cycle regulated kinase family                                                                                                                                                                                                          | (Archambault and Glover, 2009)                                                        |
| PLK4   | Centrosome                                                                                 | Member of the polo-like kinase family; required for centriole duplication in <i>Drosophila</i> and humans                                                                                                                                                      | (Bettencourt-Dias et al., 2005; Habedanck et al., 2005; Kleylein-Sohn et al., 2007)   |
| POC1   | Centriole (proximal end), fiber systems                                                    | Identified in <i>Chlamydomonas</i> centriole proteome and <i>Tetrahymena</i> basal body proteome; depletion in <i>Drosophila</i> is lethal; depletion in <i>Chlamydomonas</i> impairs centriole duplication and overexpression results in elongated centrioles | (Keller et al., 2005; Dietzl et al., 2007; Kilburn et al., 2007; Keller et al., 2009) |
| POC5   | Centriole (distal end)                                                                     | Identified in <i>Chlamydomonas</i> centriole proteome; centrin-interacting protein; depletion results in growth defect                                                                                                                                         | (Keller et al., 2005; Azimzadeh et al., 2009)                                         |

|           |                                                     |                                                                                                                                                                                                                                                                                                                                                                              |                                                                                                                                                                                                                                                                                            |
|-----------|-----------------------------------------------------|------------------------------------------------------------------------------------------------------------------------------------------------------------------------------------------------------------------------------------------------------------------------------------------------------------------------------------------------------------------------------|--------------------------------------------------------------------------------------------------------------------------------------------------------------------------------------------------------------------------------------------------------------------------------------------|
| Rootletin | Centrosome, rootlets                                | Interacts with C-NAP1                                                                                                                                                                                                                                                                                                                                                        | (Yang et al., 2006)                                                                                                                                                                                                                                                                        |
| SAS-4     | Centriole (mature and pro-centriole)                | Essential for centriole duplication in <i>C. elegans</i> , <i>Drosophila</i> , and humans; involved in attachment of microtubules to the central tube/centriole; MT-interacting domain; quantity of SAS-4 affects the length of the centriole (or at least its MTs); cell-cycle dependent degradation mediated by APC/Cdh1                                                   | (Kirkham et al., 2003; Leidel and Gonczy, 2003; Hung et al., 2004; Basto et al., 2006; Pelletier et al., 2006; Kleylein-Sohn et al., 2007; Dammermann et al., 2008; Hsu et al., 2008; Kohlmaier et al., 2009; Schmidt et al., 2009; Tang et al., 2009)                                     |
| SAS-6     | Centriole (cartwheel)                               | Essential for centriole duplication in <i>C. elegans</i> , <i>Drosophila</i> , humans, <i>Chlamydomonas</i> , zebrafish, Tetrahymena; acts early during centriole biogenesis, either as component (hub) of the cartwheel or another proximal structure in <i>C. elegans</i> ; cell-cycle dependent degradation mediated by APC/Cdh1; upstream of SAS-4 in centriolar pathway | (Dammermann et al., 2004; Leidel et al., 2005; Delattre et al., 2006; Pelletier et al., 2006; Kleylein-Sohn et al., 2007; Nakazawa et al., 2007; Peel et al., 2007; Rodrigues-Martins et al., 2007; Strnad et al., 2007; Vladar and Stearns, 2007; Yabe et al., 2007; Culver et al., 2009) |
| SZY-20    | Centrosome                                          | Suppressor of <i>C. elegans</i> <i>zyg-1</i> phenotype; negative regulator of centriole duplication                                                                                                                                                                                                                                                                          | (Song et al., 2008)                                                                                                                                                                                                                                                                        |
| VFL1      | Basal body (mature and pro-basal body)              | <i>Chlamydomonas</i> mutant: variable flagella length; rotational asymmetric localisation of VFL1 mostly to triplet 1 (or 2) which is the site of pro-basal body assembly                                                                                                                                                                                                    | (Adams et al., 1985; Silflow et al., 2001)                                                                                                                                                                                                                                                 |
| WDR16     | Basal body (mature, pro-basal), axoneme             | Identified in <i>T. brucei</i> flagella proteome                                                                                                                                                                                                                                                                                                                             | (Broadhead et al., 2006), H. Farr K. Gull personal communication                                                                                                                                                                                                                           |
| XMAP215   | Microtubules (preferentially plus ends), centrosome | Control of MT dynamics; MT polymerase                                                                                                                                                                                                                                                                                                                                        | (Popov et al., 2001; Brouhard et al., 2008)                                                                                                                                                                                                                                                |
| ZYG-1     | Centrosome                                          | Kinase, required for daughter centriole formation in <i>C. elegans</i> ; requires SPD-2 for its centrosomal recruitment; upstream of SAS-6/SAS-5 and SAS-4 in the centriolar pathway                                                                                                                                                                                         | (O'Connell et al., 2001; Delattre et al., 2006; Pelletier et al., 2006)                                                                                                                                                                                                                    |

|                     |                                 |                                                                                                                                                                                                                                                                                                                                                     |                                                                                                                                          |
|---------------------|---------------------------------|-----------------------------------------------------------------------------------------------------------------------------------------------------------------------------------------------------------------------------------------------------------------------------------------------------------------------------------------------------|------------------------------------------------------------------------------------------------------------------------------------------|
| $\gamma$ -tubulin   | Centrosome, MT nucleation sites | MT nucleation                                                                                                                                                                                                                                                                                                                                       | (Oakley and Oakley, 1989; Raynaud-Messina and Merdes, 2007)                                                                              |
| $\delta$ -tubulin   | Centrosome (between centrioles) | In <i>Chlamydomonas</i> : uni3-1 strain has centrioles with mainly MT doublets, but also MT triplets, misplaced fiber systems; in human: $\delta$ -tubulin localises to the centrosome, presumably between the centrioles, interacts with $\gamma$ -tubulin; in <i>T. brucei</i> : depletion mainly basal bodies with MT duplets                    | (Dutcher and Trabuco, 1998; Chang and Stearns, 2000; Smrzka et al., 2000; O'Toole et al., 2003; Kato et al., 2004; Gadelha et al., 2006) |
| $\epsilon$ -tubulin | Centriole (distal appendages)   | In <i>Chlamydomonas</i> : bld-2 strain has centrioles with MT singlets, null alleles for $\epsilon$ -tubulin not viable; in <i>Paramecium</i> : depletion results in basal bodies with aberrant MT numbers; in human: stronger association with the older centriole, localisation to the distal appendages (EM), required for centriole duplication | (Goodenough and StClair, 1975; Chang and Stearns, 2000; Dupuis-Williams et al., 2002; Dutcher et al., 2002; Chang et al., 2003)          |

## References

- Adams, G. M., Wright, R. L. and Jarvik, J. W.** (1985). Defective temporal and spatial control of flagellar assembly in a mutant of *Chlamydomonas reinhardtii* with variable flagellar number. *J. Cell Biol.* **100**, 955-964.
- Andersen, J. S., Wilkinson, C. J., Mayor, T., Mortensen, P., Nigg, E. A. and Mann, M.** (2003). Proteomic characterization of the human centrosome by protein correlation profiling. *Nature* **426**, 570-574.
- Archambault, V. and Glover, D. M.** (2009). Polo-like kinases: conservation and divergence in their functions and regulation. *Nat. Rev. Mol. Cell Biol.* **10**, 265-275.
- Arts, H. H., Doherty, D., van Beersum, S. E., Parisi, M. A., Letteboer, S. J., Gorden, N. T., Peters, T. A., Marker, T., Voesenek, K., Kartono, A. et al.** (2007). Mutations in the gene encoding the basal body protein RPGRIP1L, a nephrocystin-4 interactor, cause Joubert syndrome. *Nat. Genet.* **39**, 882-888.
- Azimzadeh, J., Hergert, P., Delouvee, A., Euteneuer, U., Formstecher, E., Khodjakov, A. and Bornens, M.** (2009). hPOC5 is a centrin-binding protein required for assembly of full-length centrioles. *J. Cell Biol.* **185**, 101-114.
- Basto, R., Lau, J., Vinogradova, T., Gardiol, A., Woods, C. G., Khodjakov, A. and Raff, J. W.** (2006). Flies without centrioles. *Cell* **125**, 1375-1386.
- Bettencourt-Dias, M., Rodrigues-Martins, A., Carpenter, L., Riparbelli, M., Lehmann, L., Gatt, M. K., Carmo, N., Balloux, F., Callaini, G. and Glover, D. M.** (2005). SAK/PLK4 is required for centriole duplication and flagella development. *Curr. Biol.* **15**, 2199-2207.
- Blachon, S., Gopalakrishnan, J., Omori, Y., Polyanovsky, A., Church, A., Nicastro, D., Malicki, J. and Avidor-Reiss, T.** (2008). *Drosophila* asterless and vertebrate Cep152 Are orthologs essential for centriole duplication. *Genetics* **180**, 2081-2094.
- Blacque, O. E., Reardon, M. J., Li, C., McCarthy, J., Mahjoub, M. R., Ansley, S. J., Badano, J. L., Mah, A. K., Beales, P. L., Davidson, W. S. et al.** (2004). Loss of *C. elegans* BBS-7 and BBS-8 protein function results in cilia defects and compromised intraflagellar transport. *Genes Dev.* **18**, 1630-1642.
- Broadhead, R., Dawe, H. R., Farr, H., Griffiths, S., Hart, S. R., Portman, N., Shaw, M. K., Ginger, M. L., Gaskell, S. J., McKean, P. G. et al.** (2006). Flagellar motility is required for the viability of the bloodstream trypanosome. *Nature* **440**, 224-227.
- Brouhard, G. J., Stear, J. H., Noetzel, T. L., Al-Bassam, J., Kinoshita, K., Harrison, S. C., Howard, J. and Hyman, A. A.** (2008). XMAP215 is a processive microtubule polymerase. *Cell* **132**, 79-88.
- Carlton, J. G., Agromayor, M. and Martin-Serrano, J.** (2008). Differential requirements for Alix and ESCRT-III in cytokinesis and HIV-1 release. *Proc. Natl. Acad. Sci. U. S. A.* **105**, 10541-10546.
- Chang, B., Khanna, H., Hawes, N., Jimeno, D., He, S., Lillo, C., Parapuram, S. K., Cheng, H., Scott, A., Hurd, R. E. et al.** (2006). In-frame deletion in a novel centrosomal/ciliary protein CEP290/NPHP6 perturbs its interaction with RPGR and results in early-onset retinal degeneration in the rd16 mouse. *Hum. Mol. Genet.* **15**, 1847-1857.
- Chang, P. and Stearns, T.** (2000). Delta-tubulin and epsilon-tubulin: two new human centrosomal tubulins reveal new aspects of centrosome structure and function. *Nat. Cell Biol.* **2**, 30-35.
- Chang, P., Giddings, T. H., Jr., Winey, M. and Stearns, T.** (2003). Epsilon-tubulin is required for centriole duplication and microtubule organization. *Nat. Cell Biol.* **5**, 71-76.
- Chen, Z., Indjeian, V. B., McManus, M., Wang, L. and Dynlacht, B. D.** (2002). CP110, a cell cycle-dependent CDK substrate, regulates centrosome duplication in human cells. *Dev. Cell* **3**, 339-350.
- Chiang, A. P., Beck, J. S., Yen, H. J., Tayeh, M. K., Scheetz, T. E., Swiderski, R. E., Nishimura, D. Y., Braun, T. A., Kim, K. Y., Huang, J. et al.** (2006). Homozygosity mapping with SNP arrays identifies TRIM32, an E3 ubiquitin ligase, as a Bardet-Biedl syndrome gene (BBS11). *Proc. Natl. Acad. Sci. U. S. A.* **103**, 6287-6292.
- Culver, B. P., Meehl, J. B., Giddings, T. H., Jr. and Winey, M.** (2009). The two SAS-6 homologs in *Tetrahymena thermophila* have distinct functions in basal body assembly. *Mol. Biol. Cell* **20**, 1865-1877.
- Dammermann, A. and Merdes, A.** (2002). Assembly of centrosomal proteins and microtubule organization depends on PCM-1. *J. Cell Biol.* **159**, 255-266.
- Dammermann, A., Maddox, P. S., Desai, A. and Oegema, K.** (2008). SAS-4 is recruited to a dynamic structure in newly forming centrioles that is stabilized by the gamma-tubulin-mediated addition of centriolar microtubules. *J. Cell Biol.* **180**, 771-785.

- Dammermann, A., Muller-Reichert, T., Pelletier, L., Habermann, B., Desai, A. and Oegema, K.** (2004). Centriole assembly requires both centriolar and pericentriolar material proteins. *Dev. Cell* **7**, 815-829.
- Davis, R. E., Swiderski, R. E., Rahmouni, K., Nishimura, D. Y., Mullins, R. F., Agassandian, K., Philp, A. R., Searby, C. C., Andrews, M. P., Thompson, S. et al.** (2007). A knockin mouse model of the Bardet-Biedl syndrome 1 M390R mutation has cilia defects, ventriculomegaly, retinopathy, and obesity. *Proc. Natl. Acad. Sci. U. S. A.* **104**, 19422-19427.
- Dawe, H. R., Smith, U. M., Cullinane, A. R., Gerrelli, D., Cox, P., Badano, J. L., Blair-Reid, S., Sriram, N., Katsanis, N., Attie-Bitach, T. et al.** (2007). The Meckel-Gruber Syndrome proteins MKS1 and meckelin interact and are required for primary cilium formation. *Hum. Mol. Genet.* **16**, 173-186.
- Delattre, M., Canard, C. and Gonczy, P.** (2006). Sequential protein recruitment in *C. elegans* centriole formation. *Curr. Biol.* **16**, 1844-1849.
- Delgehr, N., Sillibourne, J. and Bornens, M.** (2005). Microtubule nucleation and anchoring at the centrosome are independent processes linked by ninein function. *J. Cell Sci.* **118**, 1565-1575.
- Delous, M., Baala, L., Salomon, R., Laclef, C., Vierkotten, J., Tory, K., Golzio, C., Lacoste, T., Besse, L., Ozilou, C. et al.** (2007). The ciliary gene RPGRIP1L is mutated in cerebello-oculo-renal syndrome (Joubert syndrome type B) and Meckel syndrome. *Nat. Genet.* **39**, 875-881.
- Dietzl, G., Chen, D., Schnorrer, F., Su, K. C., Barinova, Y., Fellner, M., Gasser, B., Kinsey, K., Oettel, S., Scheiblauer, S. et al.** (2007). A genome-wide transgenic RNAi library for conditional gene inactivation in *Drosophila*. *Nature* **448**, 151-156.
- Dix, C. I. and Raff, J. W.** (2007). *Drosophila* Spd-2 recruits PCM to the sperm centriole, but is dispensable for centriole duplication. *Curr. Biol.* **17**, 1759-1764.
- Dobbelaere, J., Josue, F., Suijkerbuijk, S., Baum, B., Tapon, N. and Raff, J.** (2008). A genome-wide RNAi screen to dissect centriole duplication and centrosome maturation in *Drosophila*. *PLoS Biol.* **6**, e224.
- Dupuis-Williams, P., Fleury-Aubusson, A., de Loubresse, N. G., Geoffroy, H., Vayssie, L., Galvani, A., Espigat, A. and Rossier, J.** (2002). Functional role of epsilon-tubulin in the assembly of the centriolar microtubule scaffold. *J. Cell Biol.* **158**, 1183-1193.
- Dutcher, S. K. and Trabuco, E. C.** (1998). The *UNI3* gene is required for assembly of basal bodies of *Chlamydomonas* and encodes delta-tubulin, a new member of the tubulin superfamily. *Mol. Biol. Cell* **9**, 1293-1308.
- Dutcher, S. K., Morrisette, N. S., Preble, A. M., Rackley, C. and Stanga, J.** (2002). Epsilon-tubulin is an essential component of the centriole. *Mol. Biol. Cell* **13**, 3859-3869.
- Fan, Y., Esmail, M. A., Ansley, S. J., Blacque, O. E., Boroevich, K., Ross, A. J., Moore, S. J., Badano, J. L., May-Simera, H., Compton, D. S. et al.** (2004). Mutations in a member of the Ras superfamily of small GTP-binding proteins causes Bardet-Biedl syndrome. *Nat. Genet.* **36**, 989-993.
- Fliegauf, M., Horvath, J., von Schnakenburg, C., Olbrich, H., Muller, D., Thumfart, J., Schermer, B., Pazour, G. J., Neumann, H. P., Zentgraf, H. et al.** (2006). Nephrocystin specifically localizes to the transition zone of renal and respiratory cilia and photoreceptor connecting cilia. *J. Am. Soc. Nephrol.* **17**, 2424-2433.
- Gadelha, C., Wickstead, B., McKean, P. G. and Gull, K.** (2006). Basal body and flagellum mutants reveal a rotational constraint of the central pair microtubules in the axonemes of trypanosomes. *J. Cell Sci.* **119**, 2405-2413.
- Gomez-Ferreria, M. A., Rath, U., Buster, D. W., Chanda, S. K., Caldwell, J. S., Rines, D. R. and Sharp, D. J.** (2007). Human Cep192 is required for mitotic centrosome and spindle assembly. *Curr. Biol.* **17**, 1960-1966.
- Goodenough, U. W. and StClair, H. S.** (1975). BALD-2: a mutation affecting the formation of doublet and triplet sets of microtubules in *Chlamydomonas reinhardtii*. *J. Cell Biol.* **66**, 480-491.
- Gorden, N. T., Arts, H. H., Parisi, M. A., Coene, K. L., Letteboer, S. J., van Beersum, S. E., Mans, D. A., Hikida, A., Eckert, M., Knutzen, D. et al.** (2008). CC2D2A is mutated in Joubert syndrome and interacts with the ciliopathy-associated basal body protein CEP290. *Am. J. Hum. Genet.* **83**, 559-571.
- Graser, S., Stierhof, Y. D. and Nigg, E. A.** (2007a). Cep68 and Cep215 (Cdk5rap2) are required for centrosome cohesion. *J. Cell Sci.* **120**, 4321-4331.
- Graser, S., Stierhof, Y. D., Lavoie, S. B., Gassner, O. S., Lamla, S., Le Clech, M. and Nigg, E. A.** (2007b). Cep164, a novel centriole appendage protein required for primary cilium formation. *J. Cell Biol.* **179**, 321-330.
- Gromley, A., Jurczyk, A., Sillibourne, J., Halilovic, E., Mogensen, M., Groisman, I., Blomberg, M. and Doxsey, S.** (2003). A novel human protein of the maternal centriole is required for the final stages of cytokinesis and entry into S phase. *J. Cell Biol.* **161**, 535-545.



- Gromley, A., Yeaman, C., Rosa, J., Redick, S., Chen, C. T., Mirabelle, S., Guha, M., Sillibourne, J. and Doxsey, S. J.** (2005). Centriolin anchoring of exocyst and SNARE complexes at the midbody is required for secretory-vesicle-mediated abscission. *Cell* **123**, 75-87.
- Habedanck, R., Stierhof, Y. D., Wilkinson, C. J. and Nigg, E. A.** (2005). The Polo kinase Plk4 functions in centriole duplication. *Nat. Cell Biol.* **7**, 1140-1146.
- Hearn, T., Spalluto, C., Phillips, V. J., Renforth, G. L., Copin, N., Hanley, N. A. and Wilson, D. I.** (2005). Subcellular localization of ALMS1 supports involvement of centrosome and basal body dysfunction in the pathogenesis of obesity, insulin resistance, and type 2 diabetes. *Diabetes* **54**, 1581-1587.
- Hiraki, M., Nakazawa, Y., Kamiya, R. and Hirono, M.** (2007). Bld10p constitutes the cartwheel-spoke tip and stabilizes the 9-fold symmetry of the centriole. *Curr. Biol.* **17**, 1778-1783.
- Hsu, W. B., Hung, L. Y., Tang, C. J., Su, C. L., Chang, Y. and Tang, T. K.** (2008). Functional characterization of the microtubule-binding and -destabilizing domains of CPAP and d-SAS-4. *Exp. Cell Res.* **314**, 2591-2602.
- Hung, L. Y., Chen, H. L., Chang, C. W., Li, B. R. and Tang, T. K.** (2004). Identification of a novel microtubule-destabilizing motif in CPAP that binds to tubulin heterodimers and inhibits microtubule assembly. *Mol. Biol. Cell* **15**, 2697-2706.
- Kato, A., Nagata, Y. and Todokoro, K.** (2004). Delta-tubulin is a component of intercellular bridges and both the early and mature perinuclear rings during spermatogenesis. *Dev. Biol.* **269**, 196-205.
- Keller, L. C., Romijn, E. P., Zamora, I., Yates, J. R., 3rd and Marshall, W. F.** (2005). Proteomic analysis of isolated chlamydomonas centrioles reveals orthologs of ciliary-disease genes. *Curr. Biol.* **15**, 1090-1098.
- Keller, L. C., Geimer, S., Romijn, E., Yates, J., 3rd, Zamora, I. and Marshall, W. F.** (2009). Molecular architecture of the centriole proteome: the conserved WD40 domain protein POC1 is required for centriole duplication and length control. *Mol. Biol. Cell* **20**, 1150-1166.
- Kilburn, C. L., Pearson, C. G., Romijn, E. P., Meehl, J. B., Giddings, T. H., Jr., Culver, B. P., Yates, J. R., 3rd and Winey, M.** (2007). New *Tetrahymena* basal body protein components identify basal body domain structure. *J. Cell Biol.* **178**, 905-912.
- Kim, J., Krishnaswami, S. R. and Gleeson, J. G.** (2008). CEP290 interacts with the centriolar satellite component PCM-1 and is required for Rab8 localization to the primary cilium. *Hum. Mol. Genet.* **17**, 3796-3805.
- Kim, J. C., Ou, Y. Y., Badano, J. L., Esmail, M. A., Leitch, C. C., Fiedrich, E., Beales, P. L., Archibald, J. M., Katsanis, N., Rattner, J. B. et al.** (2005). MKKS/BBS6, a divergent chaperonin-like protein linked to the obesity disorder Bardet-Biedl syndrome, is a novel centrosomal component required for cytokinesis. *J. Cell Sci.* **118**, 1007-1020.
- Kim, K., Lee, S., Chang, J. and Rhee, K.** (2008). A novel function of CEP135 as a platform protein of C-NAP1 for its centriolar localization. *Exp. Cell Res.* **314**, 3692-3700.
- Kirkham, M., Muller-Reichert, T., Oegema, K., Grill, S. and Hyman, A. A.** (2003). SAS-4 is a *C. elegans* centriolar protein that controls centrosome size. *Cell* **112**, 575-587.
- Kleylein-Sohn, J., Westendorf, J., Le Clech, M., Habedanck, R., Stierhof, Y. D. and Nigg, E. A.** (2007). Plk4-induced centriole biogenesis in human cells. *Dev. Cell* **13**, 190-202.
- Koblentz, B., Schoppmeier, J., Grunow, A. and Lechtreck, K. F.** (2003). Centrin deficiency in *Chlamydomonas* causes defects in basal body replication, segregation and maturation. *J. Cell Sci.* **116**, 2635-2646.
- Kohlmaier, G., Loncarek, J., Meng, X., McEwen, B. F., Mogensen, M. M., Spektor, A., Dynlacht, B. D., Khodjakov, A. and Gonczy, P.** (2009). Overly Long Centrioles and Defective Cell Division upon Excess of the SAS-4-Related Protein CPAP. *Curr Biol.*
- Kubo, A., Sasaki, H., Yuba-Kubo, A., Tsukita, S. and Shiina, N.** (1999). Centriolar satellites: molecular characterization, ATP-dependent movement toward centrioles and possible involvement in ciliogenesis. *J. Cell Biol.* **147**, 969-980.
- Leidel, S. and Gonczy, P.** (2003). SAS-4 is essential for centrosome duplication in *C. elegans* and is recruited to daughter centrioles once per cell cycle. *Dev. Cell* **4**, 431-439.
- Leidel, S., Delattre, M., Cerutti, L., Baumer, K. and Gonczy, P.** (2005). SAS-6 defines a protein family required for centrosome duplication in *C. elegans* and in human cells. *Nat. Cell Biol.* **7**, 115-125.
- Marion, V., Stoetzel, C., Schlicht, D., Messaddeq, N., Koch, M., Flori, E., Danse, J. M., Mandel, J. L. and Dollfus, H.** (2009). Transient ciliogenesis involving Bardet-Biedl syndrome proteins is a fundamental characteristic of adipogenic differentiation. *Proc. Natl. Acad. Sci. U. S. A.* **106**, 1820-1825.
- Matsuura, K., Lefebvre, P. A., Kamiya, R. and Hirono, M.** (2004). Bld10p, a novel protein essential for basal body assembly in *Chlamydomonas*: localization to the cartwheel, the first ninefold symmetrical structure appearing during assembly. *J. Cell Biol.* **165**, 663-671.

- Mayor, T., Hacker, U., Stierhof, Y. D. and Nigg, E. A.** (2002). The mechanism regulating the dissociation of the centrosomal protein C-Nap1 from mitotic spindle poles. *J. Cell Sci.* **115**, 3275-3284.
- McEwen, D. P., Koenekoop, R. K., Khanna, H., Jenkins, P. M., Lopez, I., Swaroop, A. and Martens, J. R.** (2007). Hypomorphic CEP290/NPHP6 mutations result in anosmia caused by the selective loss of G proteins in cilia of olfactory sensory neurons. *Proc. Natl. Acad. Sci. U. S. A.* **104**, 15917-15922.
- Mogensen, M. M., Malik, A., Piel, M., Bouckson-Castaing, V. and Bornens, M.** (2000). Microtubule minus-end anchorage at centrosomal and non-centrosomal sites: the role of ninein. *J. Cell Sci.* **113** ( Pt 17), 3013-3023.
- Morita, E., Sandrin, V., Chung, H. Y., Morham, S. G., Gygi, S. P., Rodesch, C. K. and Sundquist, W. I.** (2007). Human ESCRT and ALIX proteins interact with proteins of the midbody and function in cytokinesis. *EMBO J.* **26**, 4215-4227.
- Mottier-Pavie, V. and Megraw, T. L.** (2009). *Drosophila* bld10 is a centriolar protein that regulates centriole, basal body, and motile cilium assembly. *Mol. Biol. Cell* **20**, 2605-2614.
- Mykytyn, K., Mullins, R. F., Andrews, M., Chiang, A. P., Swiderski, R. E., Yang, B., Braun, T., Casavant, T., Stone, E. M. and Sheffield, V. C.** (2004). Bardet-Biedl syndrome type 4 (BBS4)-null mice implicate Bbs4 in flagella formation but not global cilia assembly. *Proc. Natl. Acad. Sci. U. S. A.* **101**, 8664-8669.
- Nachury, M. V., Loktev, A. V., Zhang, Q., Westlake, C. J., Peranen, J., Merdes, A., Slusarski, D. C., Scheller, R. H., Bazan, J. F., Sheffield, V. C. et al.** (2007). A core complex of BBS proteins cooperates with the GTPase Rab8 to promote ciliary membrane biogenesis. *Cell* **129**, 1201-1213.
- Nakazawa, Y., Hiraki, M., Kamiya, R. and Hirono, M.** (2007). SAS-6 is a cartwheel protein that establishes the 9-fold symmetry of the centriole. *Curr. Biol.* **17**, 2169-2174.
- O'Connell, K. F., Caron, C., Kopish, K. R., Hurd, D. D., Kempthues, K. J., Li, Y. and White, J. G.** (2001). The *C. elegans* zyg-1 gene encodes a regulator of centrosome duplication with distinct maternal and paternal roles in the embryo. *Cell* **105**, 547-558.
- O'Toole, E. T., Giddings, T. H., McIntosh, J. R. and Dutcher, S. K.** (2003). Three-dimensional organization of basal bodies from wild-type and delta-tubulin deletion strains of *Chlamydomonas reinhardtii*. *Mol. Biol. Cell* **14**, 2999-3012.
- Oakley, C. E. and Oakley, B. R.** (1989). Identification of gamma-tubulin, a new member of the tubulin superfamily encoded by mipA gene of *Aspergillus nidulans*. *Nature* **338**, 662-664.
- Olbrich, H., Fliegauf, M., Hoefele, J., Kispert, A., Otto, E., Volz, A., Wolf, M. T., Sasmaz, G., Trauer, U., Reinhardt, R. et al.** (2003). Mutations in a novel gene, NPHP3, cause adolescent nephronophthisis, tapeto-retinal degeneration and hepatic fibrosis. *Nat. Genet.* **34**, 455-459.
- Otto, E., Hoefele, J., Ruf, R., Mueller, A. M., Hiller, K. S., Wolf, M. T., Schuermann, M. J., Becker, A., Birkenhager, R., Sudbrak, R. et al.** (2002). A gene mutated in nephronophthisis and retinitis pigmentosa encodes a novel protein, nephroretinin, conserved in evolution. *Am. J. Hum. Genet.* **71**, 1161-1167.
- Otto, E. A., Loeys, B., Khanna, H., Hellemans, J., Sudbrak, R., Fan, S., Muerb, U., O'Toole, J. F., Helou, J., Attanasio, M. et al.** (2005). Nephrocystin-5, a ciliary IQ domain protein, is mutated in Senior-Loken syndrome and interacts with RPGR and calmodulin. *Nat. Genet.* **37**, 282-288.
- Ou, G., Blacque, O. E., Snow, J. J., Leroux, M. R. and Scholey, J. M.** (2005). Functional coordination of intraflagellar transport motors. *Nature* **436**, 583-587.
- Ou, Y. Y., Mack, G. J., Zhang, M. and Rattner, J. B.** (2002). CEP110 and ninein are located in a specific domain of the centrosome associated with centrosome maturation. *J. Cell Sci.* **115**, 1825-1835.
- Peel, N., Stevens, N. R., Basto, R. and Raff, J. W.** (2007). Overexpressing centriole-replication proteins in vivo induces centriole overduplication and de novo formation. *Curr. Biol.* **17**, 834-843.
- Pelletier, L., O'Toole, E., Schwager, A., Hyman, A. A. and Muller-Reichert, T.** (2006). Centriole assembly in *Caenorhabditis elegans*. *Nature* **444**, 619-623.
- Pfannenschmid, F., Wimmer, V. C., Rios, R. M., Geimer, S., Krockel, U., Leiberer, A., Haller, K., Nemcova, Y. and Mages, W.** (2003). *Chlamydomonas* DIP13 and human NA14: a new class of proteins associated with microtubule structures is involved in cell division. *J. Cell Sci.* **116**, 1449-1462.
- Popov, A. V., Pozniakovsky, A., Arnal, I., Antony, C., Ashford, A. J., Kinoshita, K., Tournabize, R., Hyman, A. A. and Karsenti, E.** (2001). XMAP215 regulates microtubule dynamics through two distinct domains. *EMBO J.* **20**, 397-410.
- Raynaud-Messina, B. and Merdes, A.** (2007). Gamma-tubulin complexes and microtubule organization. *Curr. Opin. Cell Biol.* **19**, 24-30.
- Rodrigues-Martins, A., Bettencourt-Dias, M., Riparbelli, M., Ferreira, C., Ferreira, I., Callaini, G. and Glover, D. M.** (2007). DSAS-6 organizes a tube-like centriole precursor, and its absence suggests modularity in centriole assembly. *Curr. Biol.* **17**, 1465-1472.

- Salisbury, J. L., Suino, K. M., Busby, R. and Springett, M.** (2002). Centrin-2 is required for centriole duplication in mammalian cells. *Curr. Biol.* **12**, 1287-1292.
- Sandblad, L., Busch, K. E., Tittmann, P., Gross, H., Brunner, D. and Hoenger, A.** (2006). The *Schizosaccharomyces pombe* EB1 homolog Mal3p binds and stabilizes the microtubule lattice seam. *Cell* **127**, 1415-1424.
- Sayer, J. A., Otto, E. A., O'Toole, J. F., Nurnberg, G., Kennedy, M. A., Becker, C., Hennies, H. C., Helou, J., Attanasio, M., Fausett, B. V. et al.** (2006). The centrosomal protein nephrocystin-6 is mutated in Joubert syndrome and activates transcription factor ATF4. *Nat. Genet.* **38**, 674-681.
- Schmidt, T. I., Kleylein-Sohn, J., Westendorf, J., Le Clech, M., Lavoie, S. B., Stierhof, Y. D. and Nigg, E. A.** (2009). Control of Centriole Length by CPAP and CP110. *Curr Biol.*
- Shah, A. S., Farmen, S. L., Moninger, T. O., Businga, T. R., Andrews, M. P., Bugge, K., Searby, C. C., Nishimura, D., Brogden, K. A., Kline, J. N. et al.** (2008). Loss of Bardet-Biedl syndrome proteins alters the morphology and function of motile cilia in airway epithelia. *Proc. Natl. Acad. Sci. U. S. A.* **105**, 3380-3385.
- Silflow, C. D., LaVoie, M., Tam, L. W., Tousey, S., Sanders, M., Wu, W., Borodovsky, M. and Lefebvre, P. A.** (2001). The Vfl1 Protein in *Chlamydomonas* localizes in a rotationally asymmetric pattern at the distal ends of the basal bodies. *J. Cell Biol.* **153**, 63-74.
- Smrzka, O. W., Delgehr, N. and Bornens, M.** (2000). Tissue-specific expression and subcellular localisation of mammalian delta-tubulin. *Curr. Biol.* **10**, 413-416.
- Song, M. H., Aravind, L., Muller-Reichert, T. and O'Connell, K. F.** (2008). The conserved protein SZY-20 opposes the Plk4-related kinase ZYG-1 to limit centrosome size. *Dev. Cell* **15**, 901-912.
- Spektor, A., Tsang, W. Y., Khoo, D. and Dynlacht, B. D.** (2007). Cep97 and CP110 suppress a cilia assembly program. *Cell* **130**, 678-690.
- Stemm-Wolf, A. J., Morgan, G., Giddings, T. H., Jr., White, E. A., Marchione, R., McDonald, H. B. and Winey, M.** (2005). Basal body duplication and maintenance require one member of the *Tetrahymena thermophila* centrin gene family. *Mol. Biol. Cell* **16**, 3606-3619.
- Stoetzel, C., Muller, J., Laurier, V., Davis, E. E., Zaghoul, N. A., Vicaire, S., Jacquelin, C., Plewniak, F., Leitch, C. C., Sarda, P. et al.** (2007). Identification of a novel BBS gene (BBS12) highlights the major role of a vertebrate-specific branch of chaperonin-related proteins in Bardet-Biedl syndrome. *Am. J. Hum. Genet.* **80**, 1-11.
- Strnad, P., Leidel, S., Vinogradova, T., Euteneuer, U., Khodjakov, A. and Gonczy, P.** (2007). Regulated HsSAS-6 levels ensure formation of a single procentriole per centriole during the centrosome duplication cycle. *Dev. Cell* **13**, 203-213.
- Tang, C. J., Fu, R. H., Wu, K. S., Hsu, W. B. and Tang, T. K.** (2009). CPAP is a cell-cycle regulated protein that controls centriole length. *Nat Cell Biol.*
- Tsang, W. Y., Bossard, C., Khanna, H., Peranen, J., Swaroop, A., Malhotra, V. and Dynlacht, B. D.** (2008). CP110 suppresses primary cilia formation through its interaction with CEP290, a protein deficient in human ciliary disease. *Dev. Cell* **15**, 187-197.
- Tsang, W. Y., Spektor, A., Vijayakumar, S., Bista, B. R., Li, J., Sanchez, I., Duensing, S. and Dynlacht, B. D.** (2009). Cep76, a centrosomal protein that specifically restrains centriole reduplication. *Dev. Cell* **16**, 649-660.
- Varmark, H., Llamazares, S., Rebollo, E., Lange, B., Reina, J., Schwarz, H. and Gonzalez, C.** (2007). Asterless is a centriolar protein required for centrosome function and embryo development in *Drosophila*. *Curr. Biol.* **17**, 1735-1745.
- Vitre, B., Coquelle, F. M., Heichette, C., Garnier, C., Chretien, D. and Arnal, I.** (2008). EB1 regulates microtubule dynamics and tubulin sheet closure in vitro. *Nat. Cell Biol.* **10**, 415-421.
- Vladar, E. K. and Stearns, T.** (2007). Molecular characterization of centriole assembly in ciliated epithelial cells. *J. Cell Biol.* **178**, 31-42.
- Yabe, T., Ge, X. and Pelegri, F.** (2007). The zebrafish maternal-effect gene cellular atoll encodes the centriolar component sas-6 and defects in its paternal function promote whole genome duplication. *Dev. Biol.* **312**, 44-60.
- Yan, X., Habedanck, R. and Nigg, E. A.** (2006). A complex of two centrosomal proteins, CAP350 and FOP, cooperates with EB1 in microtubule anchoring. *Mol. Biol. Cell* **17**, 634-644.
- Yang, J., Adamian, M. and Li, T.** (2006). Rootletin interacts with C-Nap1 and may function as a physical linker between the pair of centrioles/basal bodies in cells. *Mol. Biol. Cell* **17**, 1033-1040.
- Zhu, F., Lawo, S., Bird, A., Pinchev, D., Ralph, A., Richter, C., Muller-Reichert, T., Kittler, R., Hyman, A. A. and Pelletier, L.** (2008). The mammalian SPD-2 ortholog Cep192 regulates centrosome biogenesis. *Curr. Biol.* **18**, 136-141.
