# Supplementary material
Source: PubMed Central journal article supplement (PMC2858018)
Supplement: supp_123_9_1407__6.pdf [file supp_123_9_1407__6.pdf]

| BBS4                                                                                                       | BBS5                                                       | BBS6                                          | BBS7                                                                                                                                   | BBS8                                                                                       | BBS9                                                                                     | CEP135                                                                                                                           | Centrin                                                                | Centriolin                                                                                                                               |
|------------------------------------------------------------------------------------------------------------|------------------------------------------------------------|-----------------------------------------------|----------------------------------------------------------------------------------------------------------------------------------------|--------------------------------------------------------------------------------------------|------------------------------------------------------------------------------------------|----------------------------------------------------------------------------------------------------------------------------------|------------------------------------------------------------------------|------------------------------------------------------------------------------------------------------------------------------------------|
| XP_624286.2 GB15760-PA                                                                                     | GB17090-PA                                                 |                                               | GB18131-PA XP_395119.2                                                                                                                 | XP_001123116.1 GB10554-PA                                                                  | GB12962-PA                                                                               | GB19598-PA XP_001121524.1<br>GB17790-PA                                                                                          | GB10266-PA XP_395906.2                                                 | XP_393975.3 GB18995-PA                                                                                                                   |
| 1883                                                                                                       | 72072                                                      |                                               | 22539                                                                                                                                  | 54838 72299                                                                                |                                                                                          | 68641                                                                                                                            | 23303                                                                  | 38639                                                                                                                                    |
|                                                                                                            |                                                            |                                               |                                                                                                                                        |                                                                                            |                                                                                          | BDEG_01407                                                                                                                       | BDEG_08567                                                             | BDEG_01294                                                                                                                               |
| CE37774                                                                                                    | CE01042                                                    |                                               | CE23024                                                                                                                                | CE31071                                                                                    | CE32166                                                                                  |                                                                                                                                  |                                                                        |                                                                                                                                          |
| 94608<br>129948                                                                                            | 178376<br>182299                                           | 214066                                        | 117810<br>190054                                                                                                                       | 163723<br>140113                                                                           | 155802<br>101137                                                                         | 173417<br>166062                                                                                                                 | 21986<br>159554                                                        | 114721 44232<br>172483                                                                                                                   |
|                                                                                                            | 161738                                                     |                                               | 154949                                                                                                                                 | 171797                                                                                     | 154402                                                                                   | 168432                                                                                                                           | 156177                                                                 | 164264                                                                                                                                   |
| ENSCINP0000019082<br>XP_002125730.1                                                                        | ENSCINP0000005850<br>XP_002124803.1                        | XP_002129925.1                                | ENSCINP0000026073<br>ENSCINP0000008442<br>XP_002127808.1<br>ENSCINP0000008441                                                          | XP_002123464.1<br>ENSCINP0000019928<br>XP_002123334.1 XP_002123270.1<br>ENSCINP00000019927 | XP_002125247.1                                                                           | XP_002126689.1<br>ENSCINP00000021787<br>XP_002126770.1<br>ENSCINP00000010605                                                     | ENSCINP00000018417<br>cg93_1270                                        | XP_002119245.1<br>ENSCINP00000017781                                                                                                     |
|                                                                                                            |                                                            |                                               |                                                                                                                                        |                                                                                            |                                                                                          |                                                                                                                                  |                                                                        |                                                                                                                                          |
| XP_001920926.1 NP_001070934.1                                                                              | NP_956593.1                                                | NP_956459.1                                   | NP_001070613.1                                                                                                                         | NP_001035399.1                                                                             | XP_001921482.1                                                                           | NP_001070757.1<br>OTTDARP00000011178                                                                                             | XP_001345066.1 XP_001922913.1                                          | XP_001919236.1                                                                                                                           |
|                                                                                                            |                                                            |                                               |                                                                                                                                        |                                                                                            |                                                                                          |                                                                                                                                  |                                                                        |                                                                                                                                          |
| FBpp0087297                                                                                                | FBpp0078512                                                |                                               |                                                                                                                                        | FBpp0077718                                                                                | NP_611580.1                                                                              | FBpp0075391                                                                                                                      | FBpp0110460 FBpp0080611                                                |                                                                                                                                          |
|                                                                                                            |                                                            |                                               |                                                                                                                                        |                                                                                            |                                                                                          |                                                                                                                                  |                                                                        |                                                                                                                                          |
| XP_413706.2<br>ENSGALP00000002771                                                                          | ENSGALP00000015990                                         | ENSGALP00000014647                            | ENSGALP00000019359                                                                                                                     | ENSGALP00000017328<br>XP_421311.1                                                          | XP_418843.2<br>ENSGALP00000019874<br>ENSGALP00000019873                                  | ENSGALP00000027006<br>XP_416892.2<br>ENSGALP00000036760<br>XP_420699.2<br>ENSGALP00000022332                                     | XP_420280.1<br>ENSGALP00000012127<br>XP_420622.2<br>ENSGALP00000019297 | XP_414814.1<br>ENSGALP00000007847<br>XP_415403.2<br>ENSGALP00000038078<br>ENSGALP00000038077<br>ENSGALP00000038081<br>ENSGALP00000038080 |
|                                                                                                            | GL50803_8146                                               |                                               |                                                                                                                                        | GL50803_8508                                                                               |                                                                                          |                                                                                                                                  | GL50803_6744                                                           |                                                                                                                                          |
| OTTHUMP00000175949<br>OTTHUMP00000164777                                                                   | OTTHUMP00000163062                                         | OTTHUMP00000162353<br>OTTHUMP00000030274      | OTTHUMP00000164091<br>NP_060660.2                                                                                                      | NP_938052.1<br>OTTHUMP00000028245<br>NP_938051.1 NP_653197.2                               | NP_001028777.1 NP_940820.1<br>NP_001028776.1<br>OTTHUMP00000158833<br>OTTHUMP00000024560 | OTTHUMP00000161217<br>NP_078265.2                                                                                                | OTTHUMP00000071829<br>OTTHUMP00000162193<br>OTTHUMP00000026058         | OTTHUMP00000022010<br>OTTHUMP00000158535<br>OTTHUMP00000022003<br>OTTHUMP00000022004                                                     |
| LmjF36.2280<br>53377<br>23427<br>28891                                                                     | LmjF12.0680<br>207456<br>32801<br>34252                    | 145572                                        | LmjF29.0710<br>223884<br>68114                                                                                                         | LmjF09.0440<br>161371<br>32314<br>90879                                                    | LmjF32.1240<br>222053 176459<br>33174<br>80972                                           | 213275 67690<br>39071                                                                                                            | LmjF07.0710<br>218790<br>19580<br>56351                                | 136351<br>26670 37452<br>77107                                                                                                           |
| 40410                                                                                                      | 164107                                                     | 50325                                         | 148193 103100                                                                                                                          | 159317 83222                                                                               | 10499 144317                                                                             |                                                                                                                                  | 106028                                                                 | 91406                                                                                                                                    |
|                                                                                                            |                                                            |                                               |                                                                                                                                        |                                                                                            |                                                                                          |                                                                                                                                  |                                                                        |                                                                                                                                          |
|                                                                                                            |                                                            |                                               |                                                                                                                                        |                                                                                            |                                                                                          | 30149                                                                                                                            | 28265                                                                  |                                                                                                                                          |
|                                                                                                            |                                                            |                                               |                                                                                                                                        |                                                                                            |                                                                                          |                                                                                                                                  |                                                                        |                                                                                                                                          |
| GSPATP00005292001                                                                                          | GSPATP00036912001<br>GSPATP00034169001                     |                                               | GSPATP00026091001                                                                                                                      | GSPATP00028481001                                                                          | GSPATP00027545001                                                                        | GSPATP00009438001<br>GSPATP00019908001                                                                                           | GSPATP00030725001<br>GSPATP00026291001                                 | GSPATP00007697001<br>GSPATP00022750001                                                                                                   |
|                                                                                                            |                                                            |                                               |                                                                                                                                        |                                                                                            |                                                                                          |                                                                                                                                  |                                                                        |                                                                                                                                          |
|                                                                                                            | 109500                                                     |                                               | 108146                                                                                                                                 | 109079                                                                                     |                                                                                          | 69693<br>133301                                                                                                                  | 128401 87691 233973<br>108216                                          |                                                                                                                                          |
|                                                                                                            |                                                            |                                               |                                                                                                                                        |                                                                                            |                                                                                          |                                                                                                                                  | PFA0345w                                                               |                                                                                                                                          |
|                                                                                                            |                                                            |                                               |                                                                                                                                        |                                                                                            |                                                                                          |                                                                                                                                  |                                                                        |                                                                                                                                          |
| GLEAN3_18697 XP_001202895.1<br>XP_786510.2                                                                 | GLEAN3_18028<br>GLEAN3_22767 XP_792212.1<br>XP_001202535.1 | GLEAN3_24419<br>XP_786835.1<br>XP_001183589.1 | XP_001203356.1 XP_001188908.1<br>GLEAN3_14001 XP_798575.2<br>XP_001191665.1 GLEAN3_05312<br>GLEAN3_23783 XP_790931.2<br>XP_001191706.1 | XP_001198570.1 XP_001199780.1<br>GLEAN3_12560                                              | GLEAN3_00493 XP_001190229.1<br>XP_001194456.1 XP_001201657.1<br>XP_793825.2              | XP_792224.1 XP_001202035.1<br>XP_781904.2 XP_001189902.1                                                                         | XP_794321.2 XP_001193391.1<br>XP_001177362.1 XP_001176455.1            | XP_797673.1                                                                                                                              |
| ENSTRUP00000042271<br>ENSTRUP00000042267<br>ENSTRUP00000042268<br>ENSTRUP00000042269<br>ENSTRUP00000042270 | ENSTRUP00000045891                                         | ENSTRUP00000000326<br>ENSTRUP00000000327      | ENSTRUP00000018248                                                                                                                     | ENSTRUP00000046798<br>ENSTRUP00000046797<br>ENSTRUP00000046796                             | ENSTRUP00000000646<br>ENSTRUP00000000645                                                 | ENSTRUP00000039917<br>ENSTRUP00000039916<br>ENSTRUP00000039921<br>ENSTRUP00000039918<br>ENSTRUP00000039919<br>ENSTRUP00000039920 | ENSTRUP000000023721<br>ENSTRUP000000021965                             |                                                                                                                                          |
| 214.m00049                                                                                                 | 131.m00082                                                 |                                               | 96.m00149                                                                                                                              | 78.m00118                                                                                  | 64.m00248                                                                                | 399.m00011 260.m00025                                                                                                            | 41.m00190<br>35423<br>TA02500                                          | 54.m00206                                                                                                                                |
|                                                                                                            |                                                            |                                               |                                                                                                                                        |                                                                                            |                                                                                          |                                                                                                                                  |                                                                        |                                                                                                                                          |
|                                                                                                            | TGGT1_010150                                               | 53298                                         | 25051                                                                                                                                  | 49816                                                                                      | 22294                                                                                    |                                                                                                                                  | TGVEG_004780 TGME49_047230<br>TGGT1_025770                             |                                                                                                                                          |
| 18483                                                                                                      | 50116                                                      |                                               |                                                                                                                                        |                                                                                            |                                                                                          |                                                                                                                                  | 25393                                                                  | 54619                                                                                                                                    |
|                                                                                                            |                                                            |                                               |                                                                                                                                        |                                                                                            |                                                                                          |                                                                                                                                  |                                                                        |                                                                                                                                          |
|                                                                                                            | 90976.m00058                                               |                                               |                                                                                                                                        | 91962.m00087                                                                               | 89996.m00100                                                                             | 80674.m00020 82538.m00086<br>83472.m00460                                                                                        | 94232.m00020 80798.m00086<br>81190.m00171                              | 93357.m00029                                                                                                                             |
| Tb10.6k15.3940                                                                                             | Tb927.1.4140                                               |                                               | Tb927.3.3640                                                                                                                           | Tb11.01.4290                                                                               | Tb11.01.6070                                                                             |                                                                                                                                  | Tb927.8.1080                                                           |                                                                                                                                          |

| CEP164                                                                                                                                           | CEP192                                                                                                       | CAP350                                                                                                                           | CEP55                                                                                                      | CEP68                                                                                | CEP76                                                                                                                                                                                                             | CEP97                                                                                                                            | CP110                                                                                               | DIP13                                                                                     |
|--------------------------------------------------------------------------------------------------------------------------------------------------|--------------------------------------------------------------------------------------------------------------|----------------------------------------------------------------------------------------------------------------------------------|------------------------------------------------------------------------------------------------------------|--------------------------------------------------------------------------------------|-------------------------------------------------------------------------------------------------------------------------------------------------------------------------------------------------------------------|----------------------------------------------------------------------------------------------------------------------------------|-----------------------------------------------------------------------------------------------------|-------------------------------------------------------------------------------------------|
| GB16672-PA                                                                                                                                       | GB1184-PA                                                                                                    | GB13282-PA.XP_393557.3                                                                                                           |                                                                                                            |                                                                                      |                                                                                                                                                                                                                   | GB17708-PA.XP_001122173.1                                                                                                        | GB18645-PA                                                                                          | GB13090-PA                                                                                |
| 61427                                                                                                                                            |                                                                                                              |                                                                                                                                  |                                                                                                            |                                                                                      | 456                                                                                                                                                                                                               |                                                                                                                                  |                                                                                                     | 65205                                                                                     |
|                                                                                                                                                  |                                                                                                              |                                                                                                                                  |                                                                                                            |                                                                                      | BDEG_07240                                                                                                                                                                                                        |                                                                                                                                  |                                                                                                     |                                                                                           |
| 100218<br>169222<br>156609                                                                                                                       | 219671 211819                                                                                                | 226518 209677                                                                                                                    | 223974                                                                                                     |                                                                                      | 130762 151783                                                                                                                                                                                                     | 208434                                                                                                                           | 217735 195460                                                                                       | 131284<br>159197                                                                          |
| XP_002121669.1                                                                                                                                   | ENSCINP0000002349<br>XP_002122890.1<br>ENSCINP00000020451                                                    | ENSCINP0000002338<br>ENSCINP00000028718<br>XP_002123277.1<br>ENSCINP00000024075<br>ENSCINP0000002512<br>ENSCINP00000029651       |                                                                                                            |                                                                                      | XP_002130643.1<br>ENSCINP00000022633<br>cgd5_780 cgd6_680 cgd7_304c                                                                                                                                               |                                                                                                                                  | XP_002121364.1<br>ENSCINP00000011624                                                                | XP_002131700.1<br>ENSCINP00000024109<br>XP_002119469.1<br>ENSCINP00000029736<br>cgd8_1690 |
|                                                                                                                                                  | XP_693893.3<br>DDB0218699                                                                                    | XP_001343753.2 XP_001920199.1                                                                                                    | OTTDARP0000022719<br>XP_692717.3                                                                           | OTTDARP00000024180<br>NP_001074119.1<br>OTTDARP0000001702<br>XP_001919948.1          | NP_001096589.1                                                                                                                                                                                                    | NP_938185.1                                                                                                                      | XP_001345378.2                                                                                      | XP_689621.2                                                                               |
| FBpp0073951 FBpp0073952                                                                                                                          | FBpp0075122 FBpp0088671                                                                                      |                                                                                                                                  |                                                                                                            |                                                                                      |                                                                                                                                                                                                                   | FBpp0077192 FBpp0077193                                                                                                          | FBpp0077044 FBpp0100112                                                                             |                                                                                           |
| XP_417909.2<br>ENSGALP00000011817                                                                                                                | ENSGALP00000022468                                                                                           | ENSGALP00000006296<br>XP_422262.2<br>ENSGALP00000002702                                                                          | ENSGALP00000039000<br>XP_001231504.1<br>ENSGALP00000010710                                                 | ENSGALP00000014274<br>XP_419343.2<br>ENSGALP00000016220                              | XP_0021231809.1<br>ENSGALP00000034644<br>ENSGALP00000022439<br>XP_002135558.1                                                                                                                                     | XP_416617.2<br>ENSGALP00000024714                                                                                                | ENSGALP00000039138<br>XP_414915.2<br>ENSGALP00000011207                                             | ENSGALP00000011925<br>XP_418582.1 XP_001233637.1<br>XP_001233675.1                        |
| GL50803_24423                                                                                                                                    |                                                                                                              |                                                                                                                                  |                                                                                                            |                                                                                      | GL50803_5672                                                                                                                                                                                                      |                                                                                                                                  |                                                                                                     | GL50803_16263                                                                             |
| NP_055771.4<br>LmjF17_1140 LmjF28_2390<br>LmjF12_0510                                                                                            | OTTHUMP00000071748<br>OTTHUMP00000071750<br>OTTHUMP00000071749<br>NP_115518.2<br>OTTHUMP00000071751          | OTTHUMP00000033201<br>OTTHUMP00000033199<br>OTTHUMP00000033202<br>OTTHUMP00000033200<br>OTTHUMP00000192895<br>OTTHUMP00000033203 | NP_060601.3 NP_001120654.1<br>OTTHUMP00000020117<br>OTTHUMP00000020118                                     | OTTHUMP00000159934<br>OTTHUMP00000159935<br>OTTHUMP00000178791<br>OTTHUMP00000028233 | OTTHUMP00000071724<br>OTTHUMP00000071719<br>OTTHUMP00000071721<br>OTTHUMP00000162484<br>OTTHUMP00000071720<br>OTTHUMP00000071722<br>OTTHUMP00000071723<br>NP_115645.3<br>OTTHUMP00000080445<br>OTTHUMP00000164678 | OTTHUMP00000120278                                                                                                               | NP_055526.3<br>OTTHUMP00000162162<br>OTTHUMP00000080381<br>OTTHUMP00000080380<br>OTTHUMP00000162163 | OTTHUMP00000022691<br>OTTHUMP00000112223                                                  |
| 105990<br>13726<br>70383                                                                                                                         | 11927                                                                                                        | 89468 135146 140328 5691f<br>28503                                                                                               |                                                                                                            |                                                                                      | LmjF28_2090 LmjF05_1020<br>229828<br>26831 32767<br>31102                                                                                                                                                         | 210409                                                                                                                           | 157573                                                                                              | LmjF34_4540<br>214610<br>10940<br>71898                                                   |
| 128876                                                                                                                                           | 225408 246496 219395                                                                                         | 215825 212801 87242 199442                                                                                                       |                                                                                                            |                                                                                      | 219939                                                                                                                                                                                                            |                                                                                                                                  | 222993                                                                                              | 90789                                                                                     |
| GSPATP00011678001<br>GSPATP00026805001<br>GSPATP00033074001<br>GSPATP00021670001                                                                 |                                                                                                              | GSPATP00002266001<br>GSPATP00019107001                                                                                           |                                                                                                            |                                                                                      | GSPATP00029653001<br>GSPATP00022693001<br>GSPATP00025665001<br>GSPATP00030898001                                                                                                                                  |                                                                                                                                  |                                                                                                     | GSPATP00031715001<br>GSPATP00014975001                                                    |
| 232018<br>132583 158245 143662                                                                                                                   |                                                                                                              | 140128<br>PFE0070w                                                                                                               |                                                                                                            |                                                                                      | 142088<br>PFF0185c PFL2110c                                                                                                                                                                                       |                                                                                                                                  |                                                                                                     | 65272 16601 172179<br>108625<br>MAL13P1.331                                               |
| XP_784792.2 XP_001189278.1                                                                                                                       | XP_001202129.1 XP_001187317.1<br>XP_790994.2 XP_001194286.1<br>GLEAN3_17452 XP_001181926.1<br>XP_001189923.1 | GLEAN3_18326 XP_782826.2<br>XP_001188934.1                                                                                       |                                                                                                            | XP_800003.2 XP_001190247.1                                                           | XP_780096.2 XP_001184625.1                                                                                                                                                                                        | XP_001189892.1 XP_780440.2<br>XP_001194053.1 XP_780521.2<br>GLEAN3_21340                                                         |                                                                                                     | XP_791762.1 XP_001178037.1                                                                |
| ENSTRUP00000017587                                                                                                                               | ENSTRUP00000031444<br>ENSTRUP00000031445<br>ENSTRUP00000031443<br>ENSTRUP00000031442                         | ENSTRUP00000024377<br>ENSTRUP00000024378<br>ENSTRUP00000024375<br>ENSTRUP00000024374<br>ENSTRUP00000024376                       | ENSTRUP00000027582<br>ENSTRUP00000027583<br>ENSTRUP00000027584<br>ENSTRUP00000027585<br>ENSTRUP00000027586 | ENSTRUP00000001005                                                                   | ENSTRUP00000030946                                                                                                                                                                                                | ENSTRUP00000031065<br>ENSTRUP00000031066<br>ENSTRUP00000031064<br>ENSTRUP00000031068<br>ENSTRUP00000031067<br>ENSTRUP00000031063 |                                                                                                     | ENSTRUP00000026152<br>ENSTRUP00000026239                                                  |
| 214.m00046 94.m00127<br>16.m00389 7.m00305 13.m00328<br>57.m00243                                                                                | 72.m00131                                                                                                    | 57.m00227                                                                                                                        |                                                                                                            |                                                                                      | 62.m00250                                                                                                                                                                                                         |                                                                                                                                  |                                                                                                     |                                                                                           |
| TGME49_114360 TGVEG_099450                                                                                                                       | 57490 55530                                                                                                  | 53203                                                                                                                            |                                                                                                            |                                                                                      | TA11690 TA09225<br>TGGT1_081760 TGME49_026610<br>TGVEG_067670 TGVEG_101860<br>TGME49_116730 TGME49_116720<br>TGGT1_094560 TGVEG_101850<br>TGME49_040910 TGVEG_090360<br>TGGT1_049850                              |                                                                                                                                  | TGGT1_096790 TGVEG_050430<br>TGGT1_054490 TGME49_095450<br>24325                                    |                                                                                           |
| 89183.m00139 94962.m00278<br>88914.m00133 92757.m00230<br>84963.m00116 90782.m00048<br>86088.m00555<br>T6927.5.2440 Tb11.01.3520<br>T6927.1.3560 |                                                                                                              |                                                                                                                                  |                                                                                                            |                                                                                      | 81869.m00193 87835.m00207<br>90175.m00081<br>Tb11.01.0600                                                                                                                                                         |                                                                                                                                  |                                                                                                     | Tb10.61.2720                                                                              |

| EB1                                                                                                                                                                                                                                                                           | FOP                                                                                                                                             | MKS1                                                                                                       | MKS3                                                                                                   | MKS4                                                                                                                                                             | MKS5                                                                                                                                                                                                                                                                                                                                           | MKS6                                                                                                                                                                                                                           | NAP1                                                                                                                                                                                            | Ninein                                                                                                                                                                                                           |
|-------------------------------------------------------------------------------------------------------------------------------------------------------------------------------------------------------------------------------------------------------------------------------|-------------------------------------------------------------------------------------------------------------------------------------------------|------------------------------------------------------------------------------------------------------------|--------------------------------------------------------------------------------------------------------|------------------------------------------------------------------------------------------------------------------------------------------------------------------|------------------------------------------------------------------------------------------------------------------------------------------------------------------------------------------------------------------------------------------------------------------------------------------------------------------------------------------------|--------------------------------------------------------------------------------------------------------------------------------------------------------------------------------------------------------------------------------|-------------------------------------------------------------------------------------------------------------------------------------------------------------------------------------------------|------------------------------------------------------------------------------------------------------------------------------------------------------------------------------------------------------------------|
| XP_623370.1 GB19881-PA<br>AT5G62500.1 AT3G47690.1<br>AT5G62720.1                                                                                                                                                                                                              | XP_396617.3 GB18614-PA<br>GB10545-PA                                                                                                            | GB12794-PA XP_001120316.1                                                                                  | GB12651-PA GB19576-PA<br>GB14376-PA                                                                    | GB18714-PA XP_001122136.1                                                                                                                                        | GB18181-PA XP_001121635.1<br>GB18807-PA                                                                                                                                                                                                                                                                                                        | GB16247-PA                                                                                                                                                                                                                     | GB30086-PA XP_6244002.1<br>GB10082-PA                                                                                                                                                           |                                                                                                                                                                                                                  |
| 7035                                                                                                                                                                                                                                                                          |                                                                                                                                                 |                                                                                                            | 22040 61468                                                                                            |                                                                                                                                                                  |                                                                                                                                                                                                                                                                                                                                                | 72175 72596                                                                                                                                                                                                                    |                                                                                                                                                                                                 |                                                                                                                                                                                                                  |
| BDEG_07433                                                                                                                                                                                                                                                                    | BDEG_02453                                                                                                                                      | BDEG_00264                                                                                                 | BDEG_06113                                                                                             | BDEG_01167                                                                                                                                                       | BDEG_03262 BDEG_03261                                                                                                                                                                                                                                                                                                                          | BDEG_06092                                                                                                                                                                                                                     |                                                                                                                                                                                                 |                                                                                                                                                                                                                  |
| CE18982 CE26217 CE26218                                                                                                                                                                                                                                                       |                                                                                                                                                 | CE41329 CE40712                                                                                            | CE02726                                                                                                |                                                                                                                                                                  | CE25774 CE04269                                                                                                                                                                                                                                                                                                                                | CE06131                                                                                                                                                                                                                        |                                                                                                                                                                                                 |                                                                                                                                                                                                                  |
| 180168 226241                                                                                                                                                                                                                                                                 | 151396                                                                                                                                          | 157534                                                                                                     | 97867 105851                                                                                           | 228963 217708                                                                                                                                                    | 218340 228193                                                                                                                                                                                                                                                                                                                                  | 155172                                                                                                                                                                                                                         |                                                                                                                                                                                                 | 201605                                                                                                                                                                                                           |
| 194209                                                                                                                                                                                                                                                                        |                                                                                                                                                 | 20204                                                                                                      | 168773                                                                                                 | 169091 9715                                                                                                                                                      |                                                                                                                                                                                                                                                                                                                                                | 178993                                                                                                                                                                                                                         |                                                                                                                                                                                                 |                                                                                                                                                                                                                  |
| 152507                                                                                                                                                                                                                                                                        |                                                                                                                                                 | 169453                                                                                                     | 160562 161322                                                                                          | 163597                                                                                                                                                           |                                                                                                                                                                                                                                                                                                                                                | 168825 171248                                                                                                                                                                                                                  |                                                                                                                                                                                                 |                                                                                                                                                                                                                  |
| ENSCINP00000028931<br>ENSCINP00000028930<br>ENSCINP00000017486<br>ENSCINP00000028932<br>ENSCINP00000017488<br>XP_002127374.1<br>cpd7_2370<br>CMU156C                                                                                                                          | XP_002125932.1                                                                                                                                  | ENSCINP0000003134<br>XP_002121395.1<br>ENSCINP00000025479<br>ENSCINP00000025478                            | ENSCINP00000025044<br>ENSCINP00000025047<br>ENSCINP00000009402<br>XP_002126630.1<br>ENSCINP00000025046 | XP_002121281.1<br>ENSCINP00000026886<br>ENSCINP00000014504<br>ENSCINP00000014503<br>XP_002121206.1<br>ENSCINP00000026885<br>ENSCINP00000014500<br>XP_002124446.1 | ENSCINP00000018342<br>XP_002121007.1<br>ENSCINP00000020603<br>ENSCINP00000018343<br>ENSCINP00000018339                                                                                                                                                                                                                                         | ENSCINP00000006696<br>XP_002123322.1<br>ENSCINP00000006692<br>ENSCINP00000029710<br>XP_002125387.1                                                                                                                             |                                                                                                                                                                                                 | XP_002120842.1                                                                                                                                                                                                   |
| OTTDARPO0000019628<br>NP_571461.1 NP_001018312.1<br>OTTDARPO0000020723<br>OTTDARPO0000022038<br>OTTDARPO0000022037<br>OTTDARPO0000020725<br>NP_956158.1<br>OTTDARPO0000020724<br>NP_001103172.1 XP_001923886.1<br>NP_001002170.1<br>OTTDARPO0000007138<br>OTTDARPO00000024111 | OTTDARPO0000026261                                                                                                                              | OTTDARPO0000018990<br>NP_001070841.1                                                                       | XP_700974.3                                                                                            | OTD0191488                                                                                                                                                       | XP_001922153.1 XP_001921881.1                                                                                                                                                                                                                                                                                                                  | XP_698801.3                                                                                                                                                                                                                    | XP_692550.3                                                                                                                                                                                     | XP_700610.3 XP_001922227.1<br>XP_001335233.2 XP_001332720.1<br>XP_690418.3                                                                                                                                       |
| DBD0191160                                                                                                                                                                                                                                                                    |                                                                                                                                                 |                                                                                                            |                                                                                                        |                                                                                                                                                                  |                                                                                                                                                                                                                                                                                                                                                |                                                                                                                                                                                                                                |                                                                                                                                                                                                 |                                                                                                                                                                                                                  |
| FBpp0077157 FBpp0085908<br>FBpp0076502 FBpp0071405<br>FBpp0079053 FBpp0085462<br>FBpp0089088 FBpp0085464<br>FBpp0085463 FBpp0085461<br>FBpp0112596 FBpp0112595<br>FBpp08506 85691075                                                                                          |                                                                                                                                                 | FBpp0073500                                                                                                | FBpp0112166                                                                                            |                                                                                                                                                                  |                                                                                                                                                                                                                                                                                                                                                | FBpp0086100 FBpp0086099                                                                                                                                                                                                        | FBpp0083929                                                                                                                                                                                     |                                                                                                                                                                                                                  |
| ENSGALP00000035995<br>ENSGALP00000024507<br>NP_001026188.1                                                                                                                                                                                                                    | XP_419609.1<br>ENSGALP00000018610                                                                                                               | XP_415705.2<br>ENSGALP00000000998<br>ENSGALP00000039895                                                    | ENSGALP00000025642<br>XP_418334.2                                                                      | ENSGALP00000018199<br>XP_416130.2                                                                                                                                | ENSGALP00000012598<br>ENSGALP00000038922<br>ENSGALP00000005690<br>XP_001234248.1 XP_001236264.1                                                                                                                                                                                                                                                | ENSGALP00000023382<br>ENSGALP00000023381<br>XP_420777.2 XP_001232304.1                                                                                                                                                         | XP_425750.2<br>ENSGALP00000002726<br>XP_417323.2                                                                                                                                                | XP_426482.2<br>ENSGALP00000020163                                                                                                                                                                                |
| GL50803_14048                                                                                                                                                                                                                                                                 |                                                                                                                                                 |                                                                                                            |                                                                                                        |                                                                                                                                                                  |                                                                                                                                                                                                                                                                                                                                                |                                                                                                                                                                                                                                |                                                                                                                                                                                                 |                                                                                                                                                                                                                  |
| OTTHUMP00000030608<br>OTTHUMP00000163373<br>OTTHUMP000000073450<br>OTTHUMP000000073451<br>OTTHUMP00000012292                                                                                                                                                                  | OTTHUMP00000017612<br>OTTHUMP00000017613                                                                                                        | OTTHUMP00000182058<br>OTTHUMP00000165111<br>OTTHUMP00000182059<br>OTTHUMP00000165109<br>OTTHUMP00000165110 | OTTHUMP00000177903<br>NP_001135773.1                                                                   | OTTHUMP00000168670<br>NP_079390.3<br>OTTHUMP00000168672<br>OTTHUMP00000168671                                                                                    | NP_056087.2<br>OTTHUMP00000108509<br>OTTHUMP00000080888<br>OTTHUMP00000080887<br>OTTHUMP00000026336<br>NP_065099.3                                                                                                                                                                                                                             | OTTHUMP00000036196<br>OTTHUMP00000020166<br>NP_001073991.2<br>OTTHUMP00000036195<br>OTTHUMP00000036194<br>XP_00118184.1 XP_001171962.1<br>XP_001174415.1 XP_001725151.1<br>XP_001724777.1 XP_001718667.1<br>OTTHUMP00000020164 | OTTHUMP00000196679<br>OTTHUMP00000061639<br>OTTHUMP000000061640<br>OTTHUMP00000195016<br>OTTHUMP00000195017<br>OTTHUMP00000195016<br>OTTHUMP00000195010<br>OTTHUMP00000195014<br>NP_001030995.1 | NP_891989.2<br>OTTHUMP00000195019<br>NP_065972.3 NP_891991.1<br>NP_057434.3<br>OTTHUMP00000195018<br>OTTHUMP00000195017<br>OTTHUMP00000195016<br>OTTHUMP00000195010<br>OTTHUMP00000195014<br>OTTHUMP000000043419 |
| 177133<br>32858<br>44546 656633                                                                                                                                                                                                                                               | LmfF33.0050<br>236017 64934<br>22652<br>51775                                                                                                   | 228399<br>30962<br>29577                                                                                   | LmfF27_0020<br>192673<br>38408<br>62841                                                                | 184477<br>27498                                                                                                                                                  | 184477<br>61544                                                                                                                                                                                                                                                                                                                                | LmfF01_0730<br>219375<br>25895 12869 2636e<br>77673                                                                                                                                                                            |                                                                                                                                                                                                 |                                                                                                                                                                                                                  |
| 196354<br>NCU00243                                                                                                                                                                                                                                                            | 233042                                                                                                                                          | 209121 248809                                                                                              | 120147                                                                                                 | 248638 20626 220337 223974<br>105650                                                                                                                             | 50175                                                                                                                                                                                                                                                                                                                                          | 30054 145898 224689                                                                                                                                                                                                            |                                                                                                                                                                                                 |                                                                                                                                                                                                                  |
| Os04q54940.1 Os10q35580.1<br>31915 5403                                                                                                                                                                                                                                       | Os11q01170.1 Os12q01170.1                                                                                                                       |                                                                                                            |                                                                                                        |                                                                                                                                                                  |                                                                                                                                                                                                                                                                                                                                                |                                                                                                                                                                                                                                |                                                                                                                                                                                                 |                                                                                                                                                                                                                  |
| GSPATP00024775001<br>GSPATP00029347001<br>GSPATP00027278001<br>GSPATP00003968001<br>GSPATP00009957001<br>GSPATP00000446001<br>GSPATP00003747001<br>GSPATP00032765001<br>GSPATP00027670001<br>GSPATP00038011001<br>GSPATP00034868001                                           | GSPATP00015241001<br>GSPATP00009206001<br>GSPATP00011360001<br>GSPATP00004410001<br>GSPATP00019104001<br>GSPATP00002270001<br>GSPATP00006720001 | GSPATP00011904001                                                                                          | GSPATP00015939001<br>GSPATP00005677001                                                                 | GSPATP00005779001                                                                                                                                                | GSPATP00016244001                                                                                                                                                                                                                                                                                                                              | GSPATP00007873001<br>GSPATP00025665001<br>GSPATP00030898001<br>GSPATP00025666001                                                                                                                                               |                                                                                                                                                                                                 |                                                                                                                                                                                                                  |
| 54306                                                                                                                                                                                                                                                                         |                                                                                                                                                 |                                                                                                            | 48099                                                                                                  |                                                                                                                                                                  |                                                                                                                                                                                                                                                                                                                                                |                                                                                                                                                                                                                                |                                                                                                                                                                                                 |                                                                                                                                                                                                                  |
| 52398 114249 124399 124479 66459<br>140534 106866                                                                                                                                                                                                                             | 167541<br>143118 134177                                                                                                                         |                                                                                                            |                                                                                                        |                                                                                                                                                                  | 136855                                                                                                                                                                                                                                                                                                                                         |                                                                                                                                                                                                                                |                                                                                                                                                                                                 |                                                                                                                                                                                                                  |
| PFC0305w                                                                                                                                                                                                                                                                      |                                                                                                                                                 |                                                                                                            |                                                                                                        |                                                                                                                                                                  |                                                                                                                                                                                                                                                                                                                                                | PF0185c PFL2110c                                                                                                                                                                                                               |                                                                                                                                                                                                 |                                                                                                                                                                                                                  |
| 661879 671317 208732 218504<br>RO3G_14394.1 RO3G_08998.1<br>RO3G_14395.1<br>YERD16W<br>SPAC18G6.15                                                                                                                                                                            | 563805 227781                                                                                                                                   |                                                                                                            |                                                                                                        |                                                                                                                                                                  |                                                                                                                                                                                                                                                                                                                                                | RO3G_13248.1                                                                                                                                                                                                                   |                                                                                                                                                                                                 |                                                                                                                                                                                                                  |
| XP_001185519.1 XP_001191889.1<br>XP_787950.1 GLEAN3 27631                                                                                                                                                                                                                     | XP_787100.2 XP_001176074.1<br>XP_787637.1 XP_001181959.1                                                                                        | XP_787637.1 XP_001181959.1                                                                                 | XP_791033.1 XP_001199054.1                                                                             | XP_790657.1                                                                                                                                                      | XP_001198524.1 XP_792785.2<br>XP_79046.2 XP_001179958.1                                                                                                                                                                                                                                                                                        | XP_001203052.1 XP_781068.2<br>XP_001193651.1 XP_001193792.1                                                                                                                                                                    |                                                                                                                                                                                                 | XP_788604.2 XP_001179087.1                                                                                                                                                                                       |
| ENSTRUP00000012966<br>ENSTRUP00000019118<br>ENSTRUP00000013241<br>ENSTRUP00000012594<br>ENSTRUP00000023374<br>ENSTRUP00000023373<br>ENSTRUP00000023372                                                                                                                        | ENSTRUP00000012779                                                                                                                              | ENSTRUP00000018718                                                                                         | ENSTRUP00000004863<br>ENSTRUP00000026816                                                               | ENSTRUP00000010885<br>ENSTRUP00000010884<br>ENSTRUP00000010882<br>ENSTRUP00000010883<br>ENSTRUP00000032490                                                       | ENSTRUP000000021978<br>ENSTRUP000000032778<br>ENSTRUP000000032777<br>ENSTRUP000000032779<br>ENSTRUP000000032781<br>ENSTRUP000000032780<br>ENSTRUP000000032782<br>ENSTRUP000000032783<br>ENSTRUP00000016611<br>ENSTRUP00000016606<br>ENSTRUP00000016607<br>ENSTRUP00000016605<br>ENSTRUP00000016609<br>ENSTRUP00000016608<br>ENSTRUP00000016610 | ENSTRUP00000023018<br>ENSTRUP000000035842<br>ENSTRUP000000035843<br>ENSTRUP000000035844<br>ENSTRUP000000035841<br>ENSTRUP000000035845                                                                                          |                                                                                                                                                                                                 | ENSTRUP000000021428<br>ENSTRUP00000021430<br>ENSTRUP000000021429<br>ENSTRUP000000035843<br>ENSTRUP000000021427<br>ENSTRUP00000014916<br>ENSTRUP00000014915<br>ENSTRUP0000000014914                               |
| 8.m00318 73.m00186 229.m00036<br>58.m00179 10.m00342 78.m00136<br>77.m00205<br>36137<br>TA18025                                                                                                                                                                               | 69.m00270 105.m00161<br>6.m00534 61.m00222                                                                                                      | 89.m00156                                                                                                  | 198.m00078 273.m00023                                                                                  | 16.m00381 101.m00122                                                                                                                                             | 128.m00081                                                                                                                                                                                                                                                                                                                                     | 36.m00254 62.m00250<br>6295                                                                                                                                                                                                    |                                                                                                                                                                                                 |                                                                                                                                                                                                                  |
| TGVEG_068550 TGME49_027650<br>TGGT1_083050                                                                                                                                                                                                                                    | 56432                                                                                                                                           | 61316                                                                                                      | 55538                                                                                                  |                                                                                                                                                                  | 51343                                                                                                                                                                                                                                                                                                                                          | 28071                                                                                                                                                                                                                          | 55968                                                                                                                                                                                           | 52869                                                                                                                                                                                                            |
| 93469.m00003 85241.m00262<br>89135.m00247 87955.m00265<br>85699.m00083                                                                                                                                                                                                        |                                                                                                                                                 | 81238.m00180 85889.m00463                                                                                  | 81244.m00185 86322.m00058<br>93588.m00120 90756.m00173<br>86498.m00447 80754.m00134                    | 102888.m00005 93784.m00040                                                                                                                                       |                                                                                                                                                                                                                                                                                                                                                | 97465.m00138 96723.m00091<br>95634.m00071 88273.m00365                                                                                                                                                                         |                                                                                                                                                                                                 |                                                                                                                                                                                                                  |
| Tb09.160.1440 Tb927.8.2890<br>UMC5761.1                                                                                                                                                                                                                                       | Tb10.61.2870                                                                                                                                    |                                                                                                            | Tb927.5.3540                                                                                           |                                                                                                                                                                  |                                                                                                                                                                                                                                                                                                                                                | Tb09.160.3240                                                                                                                                                                                                                  |                                                                                                                                                                                                 |                                                                                                                                                                                                                  |

| NPHP1                                                                          | NPHP3                                                                                                                                  | NPHP4                                                                                                                    | NPHP5                                                                                                                                                         | PCM1                                                                                                                                                                         | PLK4                                                                             | PLK                                                                                                                                                                                                                                                               | POC1                                                                                                                                                                                                                                                                                                                                                                | POC5                                                           |
|--------------------------------------------------------------------------------|----------------------------------------------------------------------------------------------------------------------------------------|--------------------------------------------------------------------------------------------------------------------------|---------------------------------------------------------------------------------------------------------------------------------------------------------------|------------------------------------------------------------------------------------------------------------------------------------------------------------------------------|----------------------------------------------------------------------------------|-------------------------------------------------------------------------------------------------------------------------------------------------------------------------------------------------------------------------------------------------------------------|---------------------------------------------------------------------------------------------------------------------------------------------------------------------------------------------------------------------------------------------------------------------------------------------------------------------------------------------------------------------|----------------------------------------------------------------|
|                                                                                |                                                                                                                                        |                                                                                                                          |                                                                                                                                                               |                                                                                                                                                                              | XP_623133.2 GB15315-PA                                                           | GB10053-PA                                                                                                                                                                                                                                                        | GB15587-PA XP_624420.1                                                                                                                                                                                                                                                                                                                                              |                                                                |
|                                                                                | 72389                                                                                                                                  |                                                                                                                          |                                                                                                                                                               |                                                                                                                                                                              |                                                                                  |                                                                                                                                                                                                                                                                   | 27325                                                                                                                                                                                                                                                                                                                                                               |                                                                |
|                                                                                |                                                                                                                                        | BDEG_06385                                                                                                               |                                                                                                                                                               |                                                                                                                                                                              |                                                                                  |                                                                                                                                                                                                                                                                   | BDEG_01586                                                                                                                                                                                                                                                                                                                                                          | BDEG_05569 BDEG_06763<br>BDEG_03888                            |
| CE16278                                                                        |                                                                                                                                        | CE38409                                                                                                                  |                                                                                                                                                               |                                                                                                                                                                              |                                                                                  | CE22877 CE26649 CE30602                                                                                                                                                                                                                                           |                                                                                                                                                                                                                                                                                                                                                                     |                                                                |
| 203909 141498 121714 120958<br>191079<br>157551                                | 219276 186605<br>194730                                                                                                                | 223925<br>32880<br>164333                                                                                                | 168052<br>155819                                                                                                                                              | 228845                                                                                                                                                                       | 221177                                                                           | 72562 160517                                                                                                                                                                                                                                                      | 112249<br>162499                                                                                                                                                                                                                                                                                                                                                    | 224814<br>144089 9798<br>155108                                |
|                                                                                | ENSCINP00000029018<br>XP_002123449.1<br>ENSCINP00000009831<br>ENSCINP00000029015<br>NP_001071784.1<br>ENSCINP00000007133               |                                                                                                                          | ENSCINP00000024112<br>ENSCINP00000014179<br>XP_002131862.1                                                                                                    |                                                                                                                                                                              | ENSCINP00000026188<br>XP_002125497.1<br>ENSCINP00000026189<br>ENSCINP00000004628 | ENSCINP00000015359<br>XP_002121371.1<br>ENSCINP00000007493<br>ENSCINP00000007506<br>ENSCINP00000007522                                                                                                                                                            | XP_002127877.1<br>ENSCINP00000018966                                                                                                                                                                                                                                                                                                                                | XP_002130350.1<br>ENSCINP00000006751                           |
|                                                                                |                                                                                                                                        |                                                                                                                          |                                                                                                                                                               |                                                                                                                                                                              |                                                                                  | CME146C                                                                                                                                                                                                                                                           |                                                                                                                                                                                                                                                                                                                                                                     |                                                                |
|                                                                                |                                                                                                                                        | OTTDARP00000011238<br>XP_001921573.1<br>OTTDARP00000017142<br>NP_001124247.1<br>OTTDARP00000017097<br>OTTDARP00000017143 | NP_001008622.1<br>NP_001104719.1                                                                                                                              | OTTDARP00000019790<br>NP_001108595.1                                                                                                                                         |                                                                                  | OTTDARP00000020344<br>NP_958465.1 NP_001092715.1<br>XP_001919481.1<br>OTTDARP00000019795<br>NP_001003890.3<br>DDB0216332                                                                                                                                          | OTTDARP00000022008<br>NP_956412.1 NP_998214.1                                                                                                                                                                                                                                                                                                                       | OTTDARP00000018901                                             |
| NP_001070638.1                                                                 | XP_691073.2                                                                                                                            |                                                                                                                          |                                                                                                                                                               |                                                                                                                                                                              | NP_001112364.1                                                                   |                                                                                                                                                                                                                                                                   |                                                                                                                                                                                                                                                                                                                                                                     |                                                                |
|                                                                                |                                                                                                                                        |                                                                                                                          |                                                                                                                                                               |                                                                                                                                                                              | FBpp0078042                                                                      | 19068465 85690997                                                                                                                                                                                                                                                 | FBpp0075597                                                                                                                                                                                                                                                                                                                                                         |                                                                |
|                                                                                |                                                                                                                                        |                                                                                                                          |                                                                                                                                                               |                                                                                                                                                                              |                                                                                  |                                                                                                                                                                                                                                                                   |                                                                                                                                                                                                                                                                                                                                                                     |                                                                |
| ENSGALP00000013332<br>XP_419298.2                                              | XP_418790.2<br>ENSGALP00000019105                                                                                                      | ENSGALP00000001428                                                                                                       | ENSGALP00000019025<br>ENSGALP00000024116                                                                                                                      | ENSGALP000000031473<br>ENSGALP00000022090<br>ENSGALP00000036784                                                                                                              | ENSGALP00000016553                                                               | ENSGALP00000023702<br>XP_424739.2 NP_001025810.1                                                                                                                                                                                                                  | NP_001006232.1<br>ENSGALP00000018266<br>XP_414244.1<br>ENSGALP00000002194                                                                                                                                                                                                                                                                                           | XP_424797.2<br>ENSGALP00000024081                              |
|                                                                                |                                                                                                                                        |                                                                                                                          |                                                                                                                                                               |                                                                                                                                                                              |                                                                                  |                                                                                                                                                                                                                                                                   | GL50803_33762                                                                                                                                                                                                                                                                                                                                                       |                                                                |
| NP_001121651.1<br>NP_001121650.1<br>OTTHUMP000000161841<br>OTTHUMP000000161840 | OTTHUMP000000172836<br>OTTHUMP000000172842<br>OTTHUMP000000172838<br>OTTHUMP000000172839<br>OTTHUMP000000172837<br>OTTHUMP000000172835 | OTTHUMP00000007045<br>NP_065917.1                                                                                        | OTTHUMP000000172423<br>OTTHUMP000000158861<br>OTTHUMP000000172420<br>OTTHUMP000000172425<br>OTTHUMP000000172422<br>OTTHUMP000000172421<br>OTTHUMP000000172424 | OTTHUMP000000177082<br>OTTHUMP000000177087<br>OTTHUMP000000177083<br>OTTHUMP000000096525<br>NP_006188.3<br>OTTHUMP000000177086<br>OTTHUMP000000177084<br>OTTHUMP000000177085 | OTTHUMP000000164423                                                              | OTTHUMP00000010159<br>OTTHUMP000000122549<br>OTTHUMP000000122462<br>OTTHUMP000000081380                                                                                                                                                                           | OTTHUMP000000168680<br>OTTHUMP000000168681<br>OTTHUMP000000171441<br>OTTHUMP000000171439<br>NP_056241.2                                                                                                                                                                                                                                                             | NP_001092741.1 NP_689621.2                                     |
| 232470                                                                         | LmjF34.3490<br>126945                                                                                                                  | LmjF25.2000<br>125375<br>8015                                                                                            | 185823<br>37188                                                                                                                                               | 153121 176986<br>33155                                                                                                                                                       | 111275 111267                                                                    | LmjF17.0790<br>223730<br>39338<br>63986 53562                                                                                                                                                                                                                     | LmjF34.0470<br>223819<br>14637<br>33676 3161                                                                                                                                                                                                                                                                                                                        | LmjF36.2690<br>174270<br>37735<br>73050                        |
| 71176                                                                          |                                                                                                                                        |                                                                                                                          |                                                                                                                                                               |                                                                                                                                                                              |                                                                                  |                                                                                                                                                                                                                                                                   |                                                                                                                                                                                                                                                                                                                                                                     |                                                                |
| 217835                                                                         | 244876                                                                                                                                 | 242529                                                                                                                   | 158806                                                                                                                                                        | 202784 228836                                                                                                                                                                | 246408                                                                           | 128941 230033<br>NCU09258                                                                                                                                                                                                                                         | 162437                                                                                                                                                                                                                                                                                                                                                              | 246342 246343                                                  |
|                                                                                |                                                                                                                                        |                                                                                                                          |                                                                                                                                                               |                                                                                                                                                                              |                                                                                  |                                                                                                                                                                                                                                                                   |                                                                                                                                                                                                                                                                                                                                                                     |                                                                |
|                                                                                |                                                                                                                                        |                                                                                                                          |                                                                                                                                                               |                                                                                                                                                                              |                                                                                  | 32134                                                                                                                                                                                                                                                             | 3915                                                                                                                                                                                                                                                                                                                                                                |                                                                |
|                                                                                |                                                                                                                                        |                                                                                                                          |                                                                                                                                                               |                                                                                                                                                                              |                                                                                  | GSPATP00029023001<br>GSPATP00018143001<br>GSPATP00025198001<br>GSPATP00009060001<br>GSPATP00031090001<br>GSPATP00028443001<br>GSPATP00026684001<br>GSPATP00036333001<br>GSPATP00022475001<br>GSPATP00009588001<br>GSPATP00006256001<br>GSPATP00039351001<br>10628 | GSPATP00016878001<br>GSPATP00013588001<br>GSPATP00005111001<br>GSPATP00027105001                                                                                                                                                                                                                                                                                    | GSPATP00030131001<br>GSPATP00029936001                         |
|                                                                                | 135076                                                                                                                                 | 140465                                                                                                                   | 158462                                                                                                                                                        |                                                                                                                                                                              |                                                                                  |                                                                                                                                                                                                                                                                   | 133767<br>138367                                                                                                                                                                                                                                                                                                                                                    |                                                                |
|                                                                                |                                                                                                                                        |                                                                                                                          |                                                                                                                                                               |                                                                                                                                                                              |                                                                                  | YMR001C<br>SPAC23C11.16                                                                                                                                                                                                                                           |                                                                                                                                                                                                                                                                                                                                                                     |                                                                |
| XP_782288.2 XP_001185182.1                                                     | XP_001203493.1 XP_795144.2<br>GLEAN3_22587                                                                                             | XP_797126.1 XP_001203768.1<br>XP_793289.1 XP_001195422.1                                                                 | XP_001192289.1 XP_782682.2<br>XP_001199176.1 XP_782804.2                                                                                                      | XP_786223.2 XP_001188717.1                                                                                                                                                   | GLEAN3_16352 XP_001184023.1<br>XP_001192451.1                                    | GLEAN3_00468<br>GLEAN3_17949                                                                                                                                                                                                                                      | XP_797493.2                                                                                                                                                                                                                                                                                                                                                         | XP_797483.2 XP_001186713.1                                     |
|                                                                                | ENSTRUP00000045676<br>ENSTRUP00000045677<br>ENSTRUP00000045678                                                                         | ENSTRUP00000045307                                                                                                       | ENSTRUP00000023183<br>ENSTRUP00000023182                                                                                                                      | NP_001027776.1<br>ENSTRUP00000040906<br>ENSTRUP00000040912                                                                                                                   | ENSTRUP00000018584<br>ENSTRUP00000018583                                         | ENSTRUP00000003764<br>ENSTRUP00000003763<br>ENSTRUP00000003671<br>ENSTRUP00000003670<br>ENSTRUP00000003668<br>ENSTRUP00000003669<br>ENSTRUP00000003778<br>ENSTRUP00000003777                                                                                      | ENSTRUP000000043776<br>ENSTRUP000000043775<br>ENSTRUP000000043770<br>ENSTRUP000000043774<br>ENSTRUP000000043772<br>ENSTRUP000000043771<br>ENSTRUP000000043773<br>ENSTRUP00000019669<br>ENSTRUP00000019672<br>ENSTRUP00000019671<br>ENSTRUP00000019670<br>ENSTRUP00000019675<br>ENSTRUP00000019668<br>ENSTRUP00000019673<br>ENSTRUP00000019667<br>ENSTRUP00000019674 | ENSTRUP00000017168<br>ENSTRUP00000017169<br>ENSTRUP00000017170 |
| 96.m00096                                                                      | 7.m00547 31.m00371                                                                                                                     | 95.m00130 12.m00312<br>3508                                                                                              |                                                                                                                                                               |                                                                                                                                                                              |                                                                                  | 56.m00207 220.m00040<br>392.m00011 15.m00540<br>33979                                                                                                                                                                                                             | 318.m00023                                                                                                                                                                                                                                                                                                                                                          | 5.m00513                                                       |
|                                                                                |                                                                                                                                        |                                                                                                                          |                                                                                                                                                               |                                                                                                                                                                              |                                                                                  |                                                                                                                                                                                                                                                                   |                                                                                                                                                                                                                                                                                                                                                                     |                                                                |
| 54526                                                                          | 22397 54460                                                                                                                            |                                                                                                                          | 53628                                                                                                                                                         | 62202                                                                                                                                                                        | 30306                                                                            | 50801                                                                                                                                                                                                                                                             | 51125                                                                                                                                                                                                                                                                                                                                                               | 60303                                                          |
|                                                                                |                                                                                                                                        |                                                                                                                          |                                                                                                                                                               |                                                                                                                                                                              |                                                                                  |                                                                                                                                                                                                                                                                   | 82686.m00037<br>84958.m00099<br>93448.m00217                                                                                                                                                                                                                                                                                                                        | 87526.m00089                                                   |
|                                                                                | Tb927.4.1280                                                                                                                           |                                                                                                                          |                                                                                                                                                               |                                                                                                                                                                              |                                                                                  | Tb927.7.6310<br>UM03234.1                                                                                                                                                                                                                                         | Tb10.70.4780                                                                                                                                                                                                                                                                                                                                                        | Tb10.6k15.3050                                                 |

| Rootletin                                                                                                                                                              | SAS4                                                                                                                                              | SAS6                                                                                                                                                                                      | SZY-20                                                                                                      | Delta-tubulin                                                     | Epsilon-tubulin                                                                                       | Gamma-tubulin                                                                 | VFL1                                                           | WDR16                                                                                                                                           |
|------------------------------------------------------------------------------------------------------------------------------------------------------------------------|---------------------------------------------------------------------------------------------------------------------------------------------------|-------------------------------------------------------------------------------------------------------------------------------------------------------------------------------------------|-------------------------------------------------------------------------------------------------------------|-------------------------------------------------------------------|-------------------------------------------------------------------------------------------------------|-------------------------------------------------------------------------------|----------------------------------------------------------------|-------------------------------------------------------------------------------------------------------------------------------------------------|
| GB30086-PA GB10082-PA<br>XP_624402.1                                                                                                                                   | GB11770-PA XP_396122.3                                                                                                                            | GB15158-PA XP_395972.3                                                                                                                                                                    | GB11242-PA                                                                                                  | GB16674-PA XP_001122683.1                                         | XP_394700.3 GB15835-PA                                                                                | XP_394981.3 GB18755-PA                                                        |                                                                | GB13234-PA                                                                                                                                      |
|                                                                                                                                                                        | 15226                                                                                                                                             | 72351                                                                                                                                                                                     |                                                                                                             |                                                                   | 2189                                                                                                  | AT3G61650.1 ATSG05620.1                                                       |                                                                | 21121 28848                                                                                                                                     |
|                                                                                                                                                                        | BDEG_06323                                                                                                                                        | BDEG_07637                                                                                                                                                                                |                                                                                                             | BDEG_02728                                                        | BDEG_05632 BDEG_06433                                                                                 | BDEG_04849                                                                    | BDEG_07084                                                     | BDEG_06826                                                                                                                                      |
|                                                                                                                                                                        |                                                                                                                                                   |                                                                                                                                                                                           |                                                                                                             |                                                                   |                                                                                                       | CE00224                                                                       |                                                                |                                                                                                                                                 |
|                                                                                                                                                                        | 148844 226664                                                                                                                                     | 198072                                                                                                                                                                                    |                                                                                                             | 136680 159439                                                     | 218781 89314                                                                                          | 174186                                                                        | 212152                                                         | 218269 229244                                                                                                                                   |
|                                                                                                                                                                        | 142043                                                                                                                                            | 136677 176336                                                                                                                                                                             |                                                                                                             | 136082                                                            | 188195                                                                                                | 188933                                                                        |                                                                | 150613 128114                                                                                                                                   |
|                                                                                                                                                                        | 152791 162786 171974                                                                                                                              | 158310 157385                                                                                                                                                                             |                                                                                                             | 164724                                                            | 165702                                                                                                | 158831                                                                        | 155034                                                         | 159155 168135                                                                                                                                   |
| ENSCINP00000016483<br>ENSCINP00000016482<br>XP_002119303.1<br>ENSCINP00000016484                                                                                       | XP_002123980.1<br>ENSCINP00000000162                                                                                                              | ENSCINP00000018623<br>XP_002128064.1                                                                                                                                                      | XP_002119900.1<br>ENSCINP00000021131                                                                        | XP_002121850.1 NP_001027643.1                                     | ENSCINP00000002530<br>XP_002128990.1                                                                  | XP_002129233.1                                                                | XP_002122133.1<br>ENSCINP000000025492                          | ENSCINP00000011660<br>XP_002124411.1<br>ENSCINP00000011659                                                                                      |
|                                                                                                                                                                        |                                                                                                                                                   | cgd4_2610 cgd8_490<br>CMB012C CMX010C                                                                                                                                                     |                                                                                                             |                                                                   |                                                                                                       | cgd7_1980<br>CMN304C                                                          |                                                                |                                                                                                                                                 |
| XP_692550.3 XP_688293.3<br>XP_001922586.1                                                                                                                              | OTTDARP00000026300<br>XP_697409.3                                                                                                                 | XP_001335692.2 NP_998603.1<br>OTTDARP00000009325                                                                                                                                          | OTTDARP00000022968                                                                                          | NP_001002093.1<br>OTTDARP00000024251                              | OTTDARP000000003871<br>NP_957279.1<br>OTTDARP00000003844                                              | NP_957202.1<br>DDB0185068                                                     | XP_690381.2                                                    | OTTDARP000000015128<br>NP_001018475.1                                                                                                           |
|                                                                                                                                                                        |                                                                                                                                                   |                                                                                                                                                                                           |                                                                                                             |                                                                   |                                                                                                       |                                                                               |                                                                |                                                                                                                                                 |
| FBpp0083929 FBpp0083930                                                                                                                                                | FBpp0081088                                                                                                                                       | FBpp0084912<br>13068525 85691117                                                                                                                                                          | FBpp0079057 FBpp0079058                                                                                     |                                                                   |                                                                                                       | FBpp0077326 FBpp0080769<br>19173393 19170982 5170189C<br>55.m00198 307.m00057 |                                                                | FBpp0076646                                                                                                                                     |
|                                                                                                                                                                        |                                                                                                                                                   |                                                                                                                                                                                           |                                                                                                             |                                                                   |                                                                                                       |                                                                               |                                                                |                                                                                                                                                 |
| XP_425750.2<br>ENSGALP00000005940<br>ENSGALP00000002726<br>XP_417323.2                                                                                                 | ENSGALP00000027641<br>ENSGALP00000018491<br>XP_419608.2 XP_417152.2<br>ENSGALP00000027640                                                         | NP_001026444.1<br>ENSGALP00000008489                                                                                                                                                      | ENSGALP00000005915                                                                                          | ENSGALP00000008290                                                | ENSGALP000000024172                                                                                   | XP_418146.2<br>ENSGALP00000004979                                             | ENSGALP00000025453<br>XP_418316.2                              | ENSGALP00000001912                                                                                                                              |
|                                                                                                                                                                        | GL50803_13352                                                                                                                                     |                                                                                                                                                                                           |                                                                                                             | GL50803_5462                                                      | GL50803_6336                                                                                          | GL50803_114218                                                                |                                                                | GL50803_15218                                                                                                                                   |
| OTTHUMP000000196095<br>NP_001030595.1<br>OTTHUMP00000030757<br>OTTHUMP000000196679<br>OTTHUMP00000061639<br>OTTHUMP00000002222<br>OTTHUMP00000002223<br>XP_001732878.1 | OTTHUMP00000018137<br>OTTHUMP00000018138<br>OTTHUMP000000174371<br>OTTHUMP000000174372<br>OTTHUMP00000067368<br>NP_004601.3<br>OTTHUMP00000017628 | OTTHUMP00000012455                                                                                                                                                                        | OTTHUMP0000002235<br>NP_056424.1 XP_932280.1<br>XP_943492.1 XP_001714740.1                                  | OTTHUMP000000182090<br>OTTHUMP000000182091<br>OTTHUMP000000182092 | OTTHUMP00000017033<br>OTTHUMP00000017035<br>OTTHUMP00000017034                                        | OTTHUMP000000181220<br>OTTHUMP000000181218                                    | OTTHUMP000000177815<br>NP_001070969.1                          | NP_001074025.1<br>OTTHUMP000000182860<br>OTTHUMP000000196460<br>OTTHUMP000000182859                                                             |
| 169115 133011                                                                                                                                                          | LmjF13.1590<br>103874 174818<br>27468<br>81107                                                                                                    | LmjF35.4280<br>29189<br>89996                                                                                                                                                             | 234409                                                                                                      | LmjF36.4990<br>126843 225368<br>33187<br>65724 69007              | LmjF21.1010<br>224456<br>29416<br>44774                                                               | LmjF25.0960<br>237817<br>21602<br>56069                                       | LmjF25.0880<br>65544<br>22748                                  | LmjF28.1110<br>105926<br>17788<br>59637                                                                                                         |
| 232574 165346                                                                                                                                                          | 104524 26007 90077                                                                                                                                |                                                                                                                                                                                           | 244736                                                                                                      | 82063 209136                                                      | 89613                                                                                                 | 173802<br>NCU03954                                                            | 123151                                                         | 84810                                                                                                                                           |
|                                                                                                                                                                        |                                                                                                                                                   |                                                                                                                                                                                           |                                                                                                             |                                                                   |                                                                                                       |                                                                               |                                                                |                                                                                                                                                 |
|                                                                                                                                                                        | 11326                                                                                                                                             | 30207                                                                                                                                                                                     |                                                                                                             |                                                                   |                                                                                                       | Os05g06450.2 Os05g06450.1<br>25029                                            | 37183                                                          | 18472                                                                                                                                           |
|                                                                                                                                                                        |                                                                                                                                                   | GSPATP00032784001<br>GSPATP00027645001<br>GSPATP00020097001<br>GSPATP00019787001<br>GSPATP00009285001<br>GSPATP00024268001<br>GSPATP00002881001<br>GSPATP00004862001<br>GSPATP00003188001 |                                                                                                             | GSPATP00003638001<br>GSPATP00005791001                            | GSPATP000038073001                                                                                    | GSPATP00017668001<br>GSPATP00001868001                                        | GSPATP00020493001                                              | GSPATP00027925001<br>GSPATP00027924001<br>GSPATP00031525001<br>GSPATP00013985001<br>GSPATP00025338001<br>GSPATP00039722001<br>GSPATP00027926001 |
|                                                                                                                                                                        | 45511                                                                                                                                             |                                                                                                                                                                                           |                                                                                                             |                                                                   |                                                                                                       | 44225                                                                         |                                                                |                                                                                                                                                 |
|                                                                                                                                                                        | 129996 108440<br>PF14_0558                                                                                                                        | 86367<br>128318 143809<br>PFF0375c MAL13P1.85                                                                                                                                             |                                                                                                             | 66250<br>158567<br>PFI1635w                                       | 99422<br>118214<br>PF14_0725                                                                          | 170153 170860<br>109415<br>PF08_0125<br>75367 572355                          | 80573<br>136445                                                | 102190<br>137588<br>MAL13P1.245                                                                                                                 |
|                                                                                                                                                                        |                                                                                                                                                   |                                                                                                                                                                                           |                                                                                                             |                                                                   |                                                                                                       | RO3G_11100.1<br>YLR212C<br>SPBC32F12.04                                       |                                                                |                                                                                                                                                 |
| XP_001193842.1 XP_001199206.1<br>XP_001200030.1 XP_001180033.1<br>XP_001187086.1 XP_796339.2<br>XP_001199159.1 XP_794353.2                                             | XP_001201907.1 XP_796778.2<br>XP_001201804.1 XP_796764.2                                                                                          | XP_791931.2 XP_001176207.1<br>XP_784418.2 XP_001185553.1                                                                                                                                  |                                                                                                             | GLEAN3_04266                                                      | GLEAN3_13393 GLEAN3_02663<br>XP_781720.2 XP_001182983.1<br>GLEAN3_12141 XP_783098.2<br>XP_001183033.1 | NP_999657.1 GLEAN3_20943                                                      | XP_001185066.1 XP_793924.1                                     | XP_787783.1 XP_001176293.1<br>XP_001199653.1 XP_001183767.1                                                                                     |
|                                                                                                                                                                        |                                                                                                                                                   |                                                                                                                                                                                           | ENSTRUP000000027083<br>ENSTRUP00000027084<br>ENSTRUP00000015723<br>ENSTRUP00000015724<br>ENSTRUP00000015725 | ENSTRUP00000012851<br>ENSTRUP00000012850                          | ENSTRUP00000012199                                                                                    | ENSTRUP000000037747                                                           | ENSTRUP00000007529<br>ENSTRUP00000007527<br>ENSTRUP00000007529 | ENSTRUP000000033492                                                                                                                             |
| ENSTRUP000000026159<br>ENSTRUP000000026160                                                                                                                             | ENSTRUP00000039772<br>ENSTRUP00000039773<br>ENSTRUP00000039774                                                                                    | ENSTRUP00000015629<br>ENSTRUP00000015630                                                                                                                                                  |                                                                                                             |                                                                   |                                                                                                       |                                                                               |                                                                |                                                                                                                                                 |
|                                                                                                                                                                        | 16.m00410 40.m00264<br>10156                                                                                                                      | 15.m00309 101.m00122<br>113.m00089 10.m00435 41.m00222<br>23096                                                                                                                           |                                                                                                             | 24.m00232 34.m00277                                               | 8.m00446                                                                                              | 5.m00548<br>29237<br>TA03470                                                  | 83.m00211                                                      | 231.m00034<br>260819                                                                                                                            |
|                                                                                                                                                                        |                                                                                                                                                   |                                                                                                                                                                                           |                                                                                                             |                                                                   |                                                                                                       |                                                                               |                                                                |                                                                                                                                                 |
|                                                                                                                                                                        | TGME49_058710<br>TGVEG_075750 TGGT1_011480<br>28606 55968                                                                                         | TGGT1_040920 TGVEG_107890<br>TGME49_106430 TGME49_101420<br>TGGT1_059860                                                                                                                  | 57681                                                                                                       | TGME49_007600 TGVEG_040680<br>TGGT1_020490                        | TGGT1_000470 TGME49_075870<br>TGVEG_055390                                                            | TGVEG_067890<br>TGME49_026870 TGGT1_082260<br>49610                           | TGVEG_028740<br>TGGT1_104540<br>TGME49_079010                  | TGGT1_011670 TGVEG_075940<br>TGME49_058530                                                                                                      |
|                                                                                                                                                                        | 83057.m00080 83007.m00259<br>92349.m00199 85746.m00238<br>80829.m00091 86485.m00546                                                               | 94652.m00132 86581.m00019<br>136524.m00028                                                                                                                                                |                                                                                                             | 87205.m00083                                                      | 82471.m00124                                                                                          | 83992.m00196 93106.m00014                                                     |                                                                | 81295.m00071                                                                                                                                    |
|                                                                                                                                                                        | Tb11.02.0810                                                                                                                                      | Tb09.211.1930                                                                                                                                                                             |                                                                                                             | Tb11.01.2695                                                      | Tb10.70.6950 Tb11.0530                                                                                | Tb027.3.910<br>UMC3803.1                                                      | Tb11.03.0280                                                   | Tb11.02.5550                                                                                                                                    |

| XMAP215                                                                                                                                                            | ZYG1    |
|--------------------------------------------------------------------------------------------------------------------------------------------------------------------|---------|
| GB30364-PA GB10660-PA<br>XP_392874.3                                                                                                                               |         |
| AT2G35630.1                                                                                                                                                        |         |
| BDEG_04589<br>CE41405 CE20707 CE20858<br>CE28252                                                                                                                   | CE28571 |
| 154948<br>175143<br>156582                                                                                                                                         |         |
| ENSCINP00000015586<br>ENSCINP00000026759<br>ENSCINP00000015576<br>ENSCINP00000015580                                                                               |         |
| cgj5_1680<br>CMO196C                                                                                                                                               |         |
| NP_001032756.1<br>DDB0168274 DDB0232951                                                                                                                            |         |
| FBy0082678<br>19069715 19074990<br>62.m00181                                                                                                                       |         |
| ENSGALP00000013536<br>XP_001233233.1                                                                                                                               |         |
| GL50803_96399 GL50803_91480                                                                                                                                        |         |
| OTTHUMP00000081795<br>OTTHUMP00000081794<br>OTTHUMP00000081793                                                                                                     |         |
| LmjF30.1760<br>228176<br>32952<br>62456 49612<br>183698<br>NCU04535<br>Os01g60050.1 Os01g60040.2<br>Os01g60040.1<br>20299                                          |         |
| GSPATP00035152001<br>GSPATP00032050001<br>GSPATP00034778001<br>GSPATP00032198001<br>GSPATP00033603001<br>GSPATP0000281001<br>GSPATP00008659001<br>GSPATP0000836001 |         |
| 47936<br>166936 106216<br>156611<br>727336 550419                                                                                                                  |         |
| RO3G_09527.1 RO3G_06225.1<br>YLR045C<br>SPCC736.14 SPCC895.07                                                                                                      |         |
| XP_001199992.1 XP_798563.2<br>GLEANS_15952 XP_001182362.1<br>XP_001183804.1 XP_001199963.1<br>XP_001188972.1 XP_790495.2<br>XP_001188266.1                         |         |
| ENSTRUP00000039530<br>ENSTRUP00000039528<br>ENSTRUP00000039529                                                                                                     |         |
| 85.m00176 1.m00993 49.m00230<br>7217                                                                                                                               |         |
| 51833<br>105221.m00002 88808.m00117<br>83992.m00172<br>Tb027.6.3090<br>UM06328.1                                                                                   |         |
