# Supplementary material
Source: PubMed Central journal article supplement (PMC2858018)

Figure S1. Tubulin phylogeny.

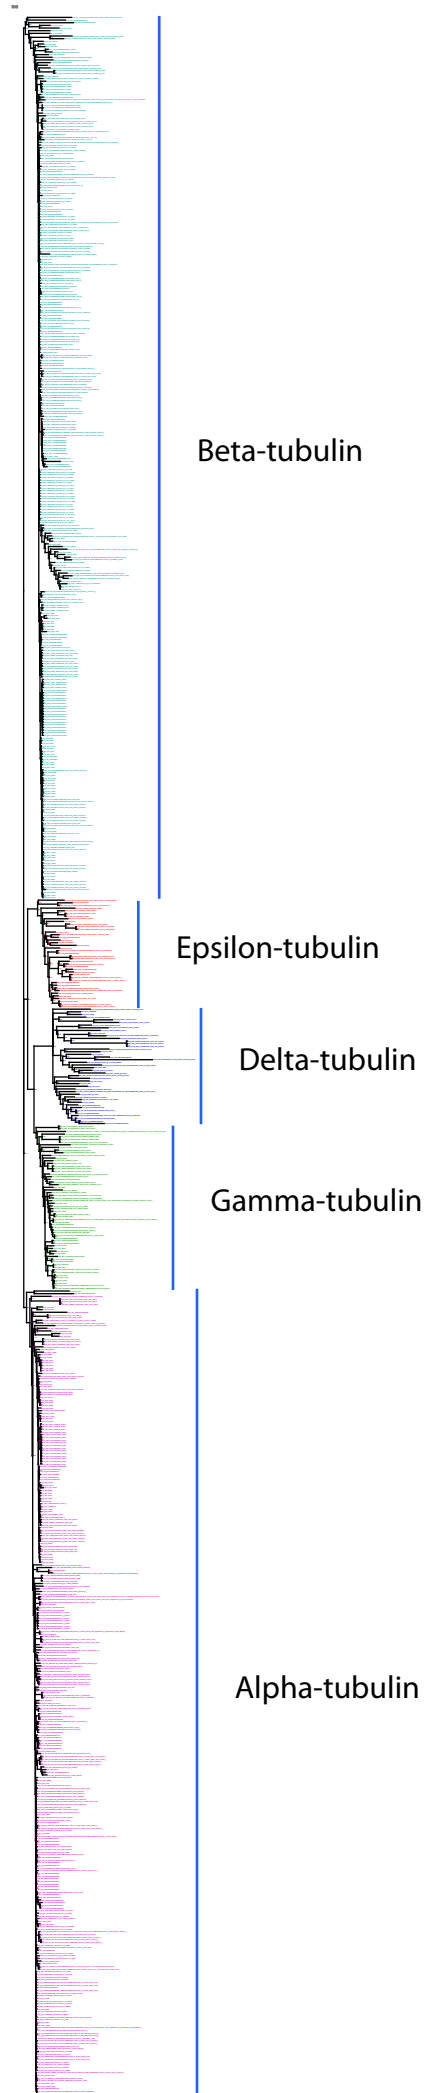

Supplement: supp_123_9_1407__1.pdf [file supp_123_9_1407__1.pdf]

Figure S2. Constrained phylogeny of SAS-4 and SAS-6.

A SAS-4

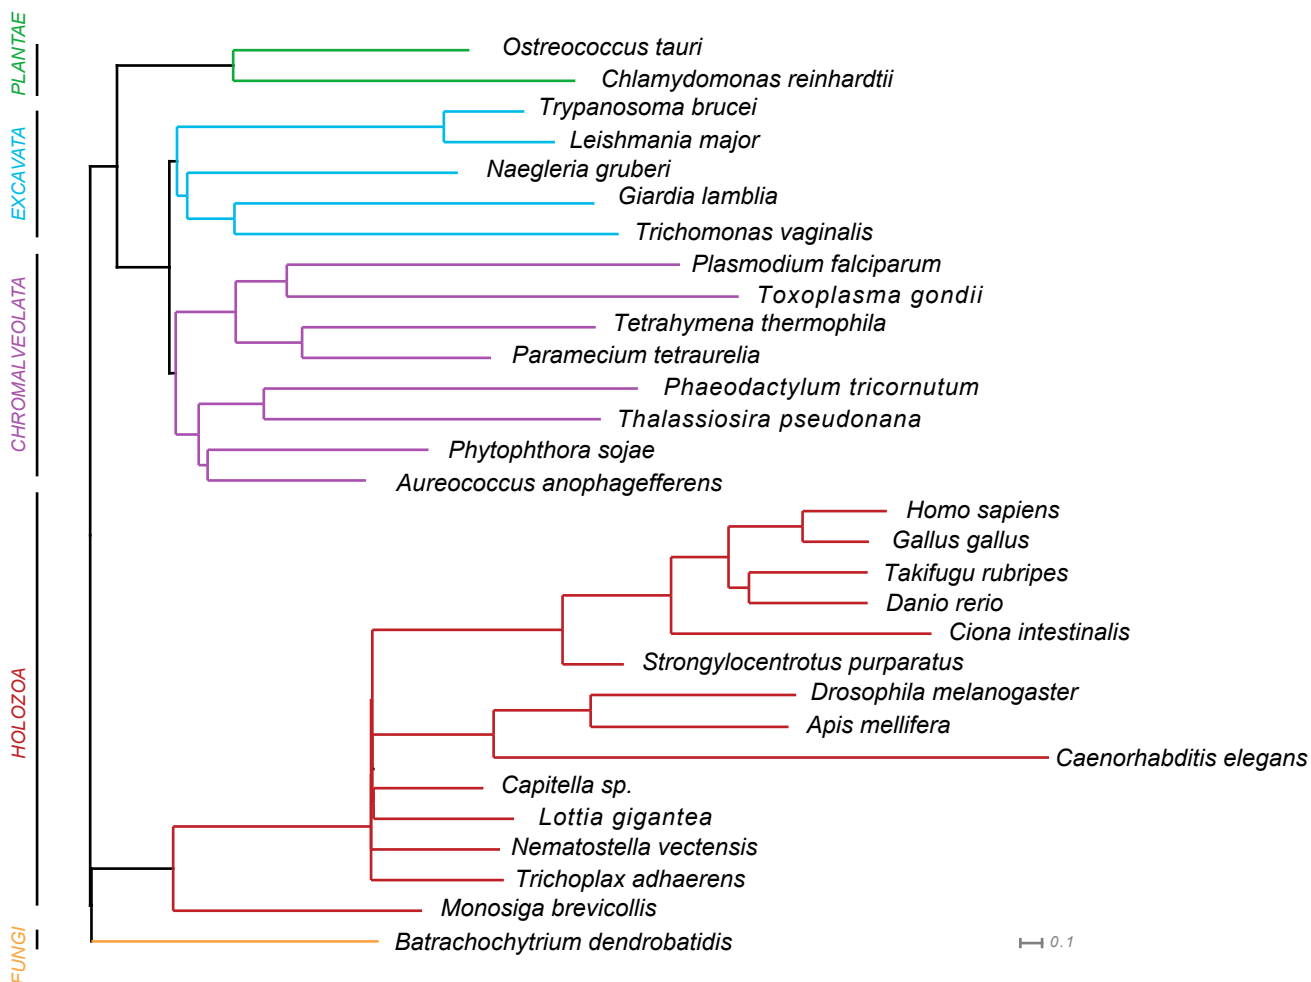

B SAS-6

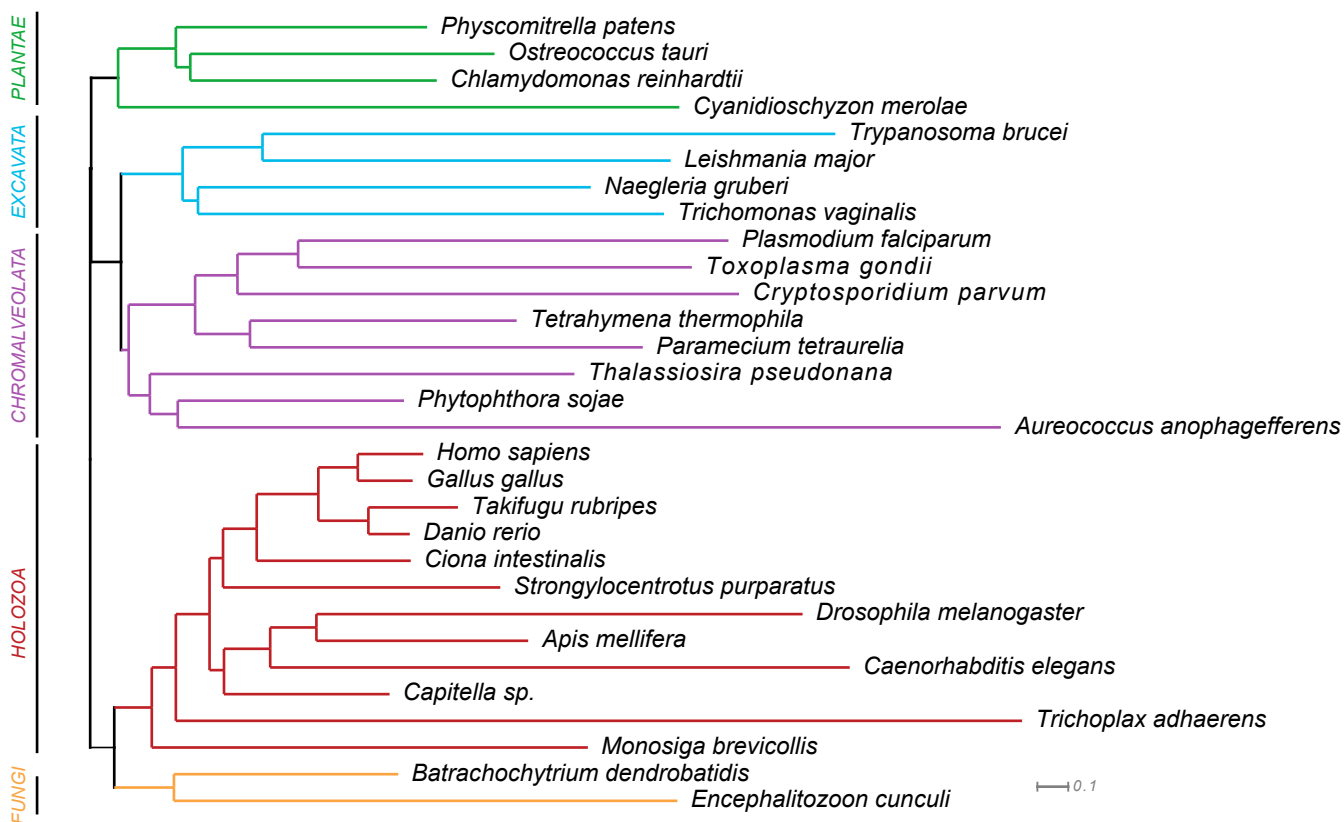

Supplement: supp_123_9_1407__2.pdf [file supp_123_9_1407__2.pdf]

Figure S3. PLK4 and ZYG-1 phylogeny.

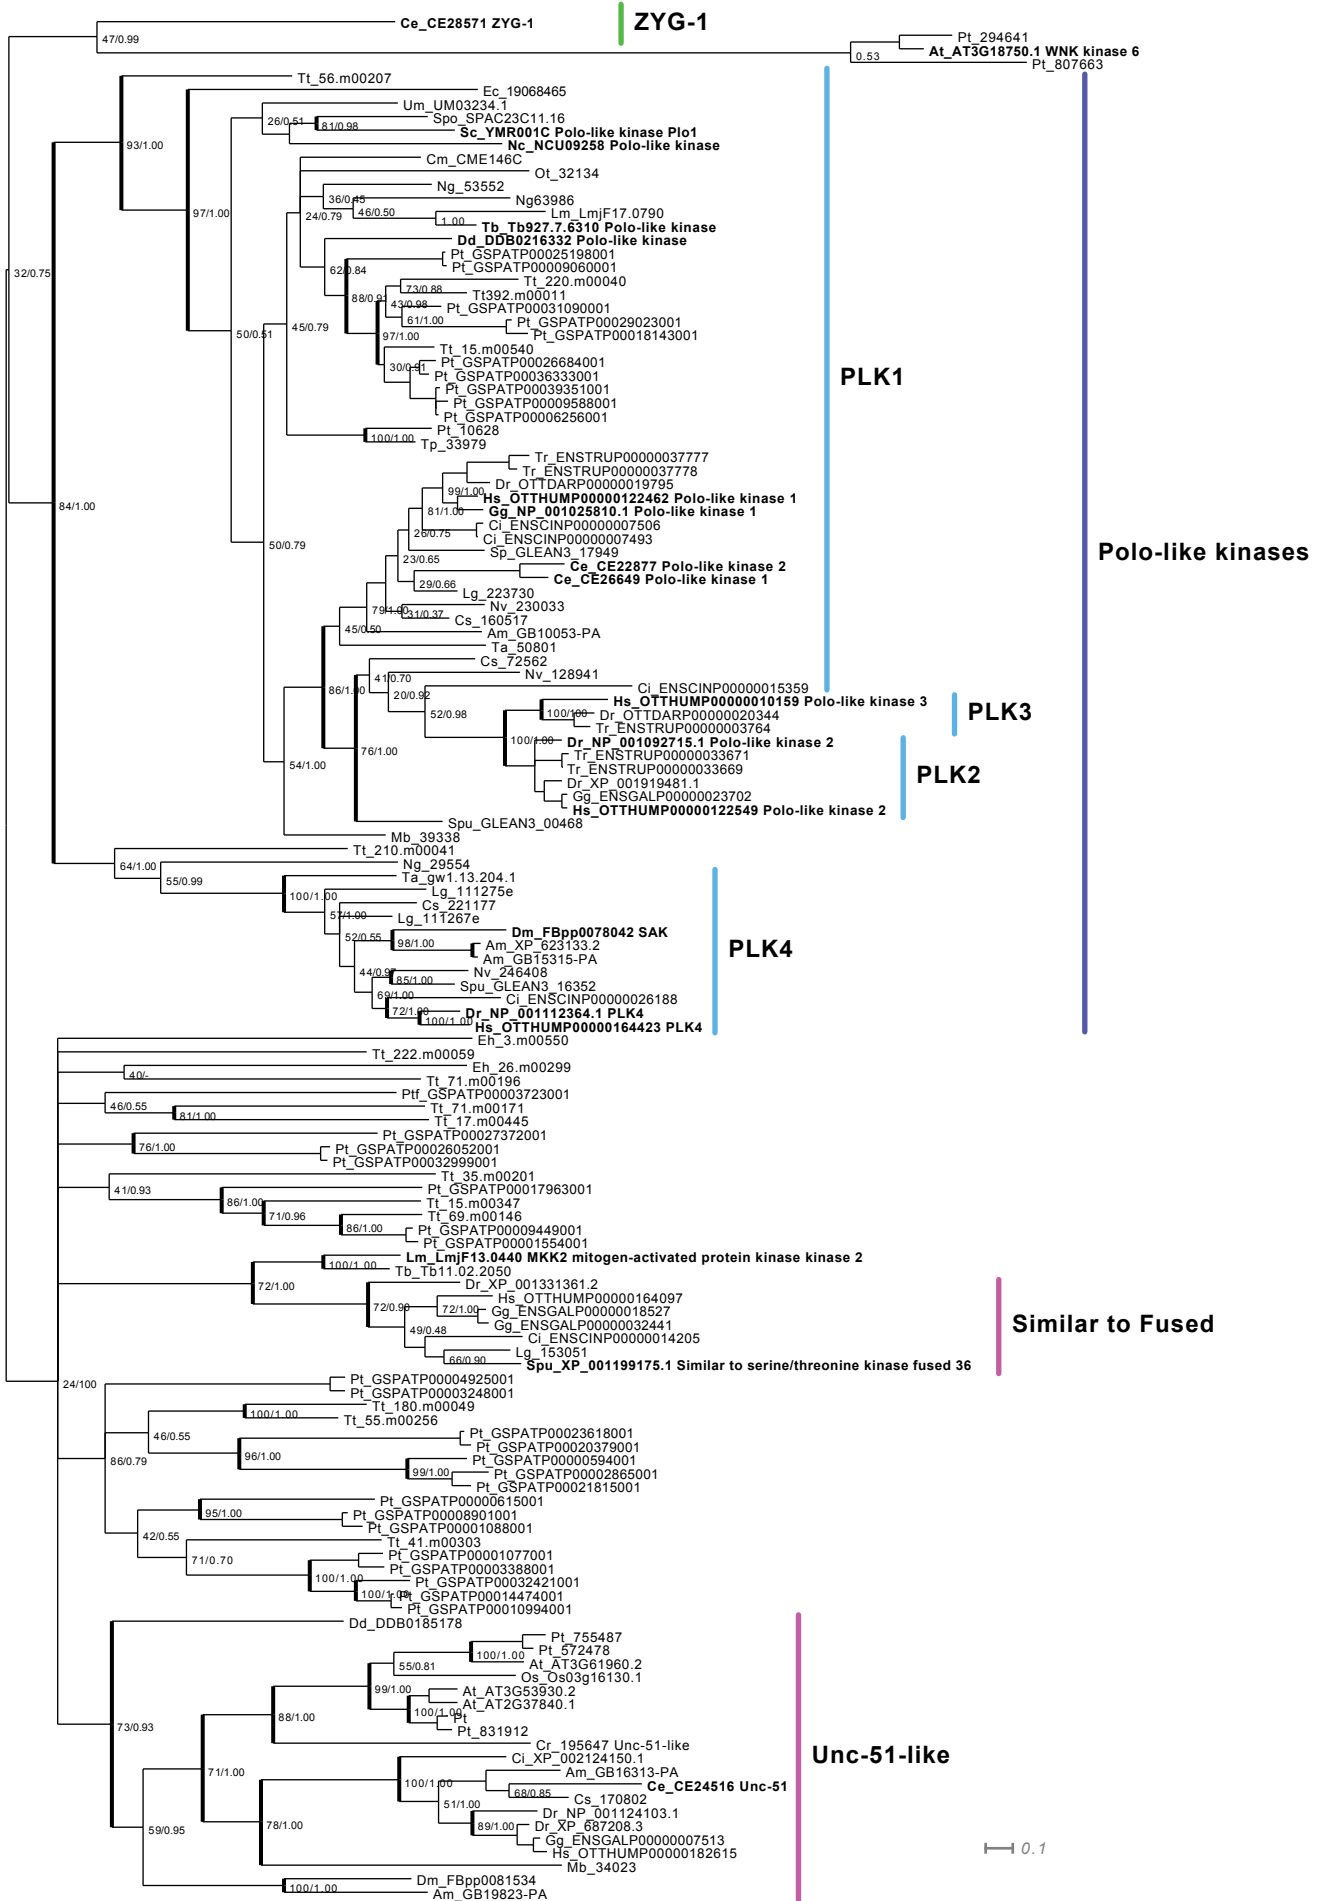

Supplement: supp_123_9_1407__3.pdf [file supp_123_9_1407__3.pdf]
